1 **Hypoxia causes pancreatic  $\beta$ -cell dysfunction by activating a**  
2 **transcriptional repressor BHLHE40**

3

4 Tomonori Tsuyama<sup>1</sup>, Yoshifumi Sato<sup>2,\*</sup>, Tatsuya Yoshizawa<sup>2</sup>, Takaaki Matsuoka<sup>3</sup>,  
5 Kazuya Yamagata<sup>1,2,\*</sup>

6

7 <sup>1</sup>Center for Metabolic Regulation of Healthy Aging (CMHA), Faculty of Life Sciences,  
8 Kumamoto University, Kumamoto 860-8556, Japan.

9 <sup>2</sup>Department of Medical Biochemistry, Faculty of Life Sciences, Kumamoto University,  
10 Kumamoto 860-8556, Japan.

11 <sup>3</sup>First Department of Internal Medicine, Wakayama Medical University, Wakayama 641-  
12 8509, Japan.

13

14 \*Corresponding author: Kazuya Yamagata, Department of Medical Biochemistry, Faculty  
15 of Life Sciences, Kumamoto University, 1-1-1 Honjo, Kumamoto 860-8556, Japan.

16 Phone: +81-96-373-5068; Email: [k-yamaga@kumamoto-u.ac.jp](mailto:k-yamaga@kumamoto-u.ac.jp).

17

18

19 \*Corresponding author: Yoshifumi Sato, Department of Medical Biochemistry, Faculty  
20 of Life Sciences, Kumamoto University, 1-1-1 Honjo, Kumamoto 860-8556, Japan.  
21 Phone: +81-96-373-5070; Email: [ysato413@kumamoto-u.ac.jp](mailto:ysato413@kumamoto-u.ac.jp).

22

### 23 **Conflict-of-interest**

24 The authors have declared that no conflict of interest exists.

25

26

27

28

29

30

31

32

33

34

35

36

37 **ABSTRACT**

38 Hypoxia can occur in pancreatic  $\beta$ -cells in type 2 diabetes. Although hypoxia exerts  
39 deleterious effects on  $\beta$ -cell function, the associated mechanisms are largely unknown.  
40 Here, we show that the transcriptional repressor basic helix-loop-helix family member  
41 e40 (BHLHE40) is highly induced in hypoxic mouse and human  $\beta$ -cells and suppresses  
42 insulin secretion. Conversely, BHLHE40 deficiency in hypoxic MIN6 cells or in the  $\beta$ -  
43 cells of *ob/ob* mice reversed the insulin secretion. Mechanistically, BHLHE40 represses  
44 expression of *Mafa*, which encodes the transcription factor musculoaponeurotic  
45 fibrosarcoma oncogene family A (MAFA), by attenuating binding of pancreas/duodenum  
46 homeobox protein 1 (PDX1) to its enhancer region. Impaired insulin secretion in hypoxic  
47  $\beta$ -cells was recovered by MAFA expression. Collectively, this work identifies BHLHE40  
48 as a key hypoxia-induced transcriptional repressor in  $\beta$ -cells and its implication in the  $\beta$ -  
49 cell dysfunction in type 2 diabetes.

50

51

52

53

54

## 55 INTRODUCTION

56           Glucose metabolism is regulated by crosstalk between pancreatic  $\beta$ -cells and  
57 insulin-sensitive tissues. In case of insulin resistance,  $\beta$ -cells increase insulin secretion to  
58 maintain normal glucose tolerance. However, when  $\beta$ -cells are incapable of this task,  
59 plasma concentrations of glucose increase. Prolonged exposure to hyperglycaemia has  
60 deleterious effects on  $\beta$ -cell function through various mechanisms, including oxidative  
61 stress, endoplasmic reticulum (ER) stress, and inflammation and contributes to the  
62 development and progression of type 2 diabetes (1-3). Because  $\beta$ -cells are highly  
63 dependent on oxidative phosphorylation for adenosine triphosphate (ATP) production and  
64 insulin secretion, high glucose conditions generate intracellular hypoxia due to large  
65 amounts of oxygen consumption. Importantly, hypoxia was shown to occur *in vivo* in  
66 islets in animal models of type 2 diabetes (4-7). Like oxidative and ER stress, hypoxia  
67 leads to  $\beta$ -cell dysfunction and loss of  $\beta$ -cells, supporting the idea that hypoxia is another  
68 mechanism leading to  $\beta$ -cell failure in type 2 diabetes (8-11).

69           Hypoxia-inducible factor (HIF), a heterodimeric transcription factor consisting  
70 of an oxygen-sensitive HIF- $\alpha$  subunit and a constitutively expressed HIF-1 $\beta$  subunit,  
71 plays critical roles in the cellular responses to hypoxia (12, 13). HIF induces the  
72 expression of a number of genes necessary for adaptation to hypoxia, including those

73 involved in glycolysis, erythropoiesis, and angiogenesis. However, hyperactivation of  
74 HIF in  $\beta$ -cells impairs insulin secretion by switching glucose metabolism from aerobic  
75 oxidative phosphorylation to anaerobic glycolysis (14-16), suggesting that activation of  
76 HIF underlies  $\beta$ -cell dysfunction and glucose intolerance in hypoxia. Besides gene  
77 induction, transcriptional repression of genes also occurs in response to hypoxia and was  
78 found to involve several transcription repressors, such as RE1 silencing transcription  
79 factor (REST), BTB and CNC homology 1 (BACH1), zinc finger E- box binding  
80 homeobox 1 (ZEB1), and inhibitor of DNA binding 2 (ID2) (17). Previously, we reported  
81 that hypoxia causes the downregulation of a number of  $\beta$ -cell genes involved in insulin  
82 secretion in mouse islets and MIN6  $\beta$ -cells (9). However, the mechanisms of hypoxia-  
83 induced transcriptional repression in  $\beta$ -cells and the contribution of gene repression to  $\beta$ -  
84 cell dysfunction are largely unknown.

85         In the present study, we identified the transcriptional repressor basic helix-loop-  
86 helix family member e40 (BHLHE40) as being highly induced in  $\beta$ -cells under hypoxic  
87 conditions and found that it inhibits glucose-stimulated insulin secretion by suppressing  
88 transcription of *Mafa*, which encodes musculoaponeurotic fibrosarcoma oncogene family  
89 A (MAFA), a transcription factor that plays critical roles in insulin secretion. We also  
90 showed that BHLHE40 deficiency reversed decreased insulin secretion by hypoxic  $\beta$ -

91 cells *in vitro* and *in vivo*. Our findings present a new scenario in which hypoxia impairs  
92  $\beta$ -cell function through activation of the transcriptional repressor BHLHE40.

93

## 94 **RESULTS**

### 95 **Global gene expression in hypoxic $\beta$ -cells and islets**

96 To assess the impact of hypoxia on global gene expression of  $\beta$ -cells, we first  
97 performed RNA sequencing (RNA-seq) on both mouse and human islets cultured under  
98 normal and low oxygen conditions. Approximately 5% of expressed mRNAs were  
99 significantly downregulated at least 1.5-fold in hypoxic compared with non-hypoxic islets  
100 (mouse, 20% vs 5%, respectively; human, 20% vs 2%, respectively; Supplemental Figure  
101 1A). Consistent with our previous findings (9), under hypoxic conditions the expression  
102 of a number of  $\beta$ -cell genes with important roles in insulin secretion was decreased in  
103 islets (Figure 1A). Gene set enrichment analysis (GSEA) revealed that two hallmark gene  
104 sets (pancreas beta cells and oxidative phosphorylation) were significantly downregulated  
105 in both mouse and human islets in hypoxia and one hallmark gene set (hypoxia) was  
106 significantly upregulated (Figure 1B and Supplemental Figure 1B). We hypothesized that  
107 transcriptional repressors are involved in the suppression of  $\beta$ -cell genes under hypoxic  
108 conditions. To identify the hypoxia-sensitive repressors in  $\beta$ -cells, we compared the RNA-

109 seq-based data of hypoxia-induced genes in mouse islets, human islets, and MIN6 cells  
110 and found that 25 genes were elevated (Figure 1C). By analyzing the gene ontology of  
111 these genes, we discovered that activating transcription factor 3 (ATF3) and BHLHE40  
112 are associated with transcriptional repression (Figure 1C). In addition, BHLHE41, REST,  
113 BACH1, ID1, ID2, ZEB1/ZEB2, and SNAI1 were reported elsewhere to function as  
114 hypoxia-induced transcriptional repressors (17). Among all these repressor genes, in our  
115 study, *Bhlhe40* mRNA was the most significantly increased in hypoxic mouse islets,  
116 human islets, and MIN6 cells (Figures 1, D-F). BHLHE40 (also referred to as  
117 DEC1/SHARP2/STRA13) is a member of the basic helix-loop-helix (bHLH) family and  
118 functions primarily as a transcriptional repressor by binding to DNA at class B E-box  
119 motifs (18). It plays pivotal roles in many biological processes, including cellular  
120 differentiation, cell growth, growth arrest, circadian rhythm, immunological response,  
121 and hypoxia, but its biological function in  $\beta$ -cells is unknown. Accordingly, we focused  
122 on the role of BHLHE40 in hypoxic  $\beta$ -cells.

123

#### 124 **Regulation of *Bhlhe40* expression in hypoxic $\beta$ -cells and islets**

125 BHLHE40 was expressed ubiquitously in adult mouse tissues, including  
126 pancreatic islets and MIN6 cells (Figure 2A and Supplemental Figure 2A). Hypoxia

127 rapidly increased the expression of *Bhlhe40* mRNA, i.e., within 3 hours, but a marked  
128 upregulation of BHLHE40 protein was noted at 12 hours and this upregulation persisted  
129 at 24 hours in MIN6 cells (Figure 2B and Supplemental Figure 2B). Increased BHLHE40  
130 expression in hypoxia was also detected in mouse islets (Figure 2C and Supplemental  
131 Figure 2C).

132 Hypoxia induces oxidative and ER stress and activation of AMP-activated  
133 protein kinase (AMPK) (6, 19, 20). However, in our study, oxidative stress (caused by  
134 treatment with H<sub>2</sub>O<sub>2</sub>), ER stress (caused by treatment with thapsigargin or tunicamycin),  
135 and AMPK activation (caused by treatment with metformin) did not increase expression  
136 of *Bhlhe40* mRNA in MIN6 cells (Figures 2, D-F), suggesting that these processes are  
137 not involved in the induction of *Bhlhe40*. Previous studies showed that HIF-1 is involved  
138 in hypoxia-induced *Bhlhe40* expression (21, 22). Consistent with this finding, hypoxia-  
139 induced *Bhlhe40* mRNA expression was partially inhibited by suppression of HIF-1 $\beta$   
140 (Figure 2G and Supplemental Figure 2D), indicating that hypoxia-induced *Bhlhe40*  
141 expression is partially HIF dependent in  $\beta$ -cells. We and others demonstrated that hypoxia  
142 occurs in islets in animal models of type 2 diabetes (4-6). Consistent with this finding,  
143 levels of *Bhlhe40* mRNA and BHLHE40 were significantly elevated (2.3-fold and 4.5-  
144 fold, respectively) in islets of *ob/ob* mice (Figures 2, H and I). Upregulation of BHLHE40



145 was detected also in islets of *db/db* mice (Figure 2J and Supplemental Figure 2E).  
146 Intracellular localization of BHLHE40 varies by cells (23). Immunohistochemical  
147 analysis revealed strong BHLHE40 immunoreactivity in the cytoplasm of islets in *ob/ob*  
148 mice, but BHLHE40 staining was clearly detected also in the nucleus of islets (Figure  
149 2K). The nuclear localization of BHLHE40 supports its function as a transcriptional  
150 repressor.

151

## 152 **BHLHE40 controls insulin secretion in $\beta$ -cells**

153 To explore the role of BHLHE40 in  $\beta$ -cells, we generated *Bhlhe40* knockdown  
154 (KD) MIN6 cells (Supplemental Figure 3A). Although BHLHE40 is reported to be  
155 involved in cell cycle and apoptosis regulation (24), hypoxia-induced growth inhibition  
156 (Supplemental Figure 3B) and cell death (Supplemental Figure 3C) were not restored in  
157 *Bhlhe40* KD MIN6 cells. Next, we investigated the impact of *Bhlhe40* KD on glucose-  
158 stimulated insulin secretion. As described previously (9), insulin secretion by high  
159 glucose was significantly decreased under hypoxic conditions without affecting insulin  
160 content (Figures 3, A and B). Of note, *Bhlhe40* KD significantly restored hypoxia-related  
161 decreased insulin secretion (Figure 3A), and conversely, BHLHE40 overexpression  
162 significantly attenuated insulin secretion (Figure 3C and Supplemental Figure 3D). These

163 results indicate that BHLHE40 is involved in suppressing the glucose-stimulated insulin  
164 secretion. Glucose-stimulated insulin secretion occurs after the generation of ATP through  
165 the metabolism of glucose. The increase of the ATP/ADP ratio leads to closure of ATP-  
166 sensitive  $K^+$  channels, membrane depolarization, an increase of cytosolic  $[Ca^{2+}]_i$  via  
167 activation of voltage-dependent  $Ca^{2+}$  channels, and eventually the exocytosis of insulin-  
168 containing secretory granules (25).

169 High  $K^+$  induced membrane depolarization evokes  $Ca^{2+}$  dependent insulin  
170 exocytosis from  $\beta$ -cells. We next investigated the role of BHLHE40 on KCl-stimulated  
171 insulin secretion. As in the case of glucose, a significant decrease in KCl-stimulated  
172 insulin secretion was detected in hypoxic MIN6 cells but not in hypoxic *Bhlhe40* KD  
173 MIN6 cells (Figure 3D). KCl produced a significantly smaller insulin secretion in MIN6  
174 cells overexpressing BHLHE40 than in control MIN6 cells (Figure 3E). The observation  
175 that KCl induced an equivalent increase of  $[Ca^{2+}]_i$  levels in both cells overexpressing  
176 BHLHE40 and control cells (Figures 3, F and G) suggests that BHLHE40 affects steps  
177 after  $[Ca^{2+}]_i$  elevation. Next, we further explored the role of BHLHE40 on exocytosis by  
178 transfecting MIN6 cells with a human growth factor (hGH) expression vector. In  
179 transfected cells, hGH is targeted to insulin-containing secretory granules, and hGH  
180 release can be used to monitor exocytosis from the cells (26, 27). As shown in Figure 3H,

181 KCl-induced hGH secretion was significantly decreased under hypoxic conditions, and  
182 the decrease was almost completely reversed by *Bhlhe40* KD. These results emphasize  
183 the role of BHLHE40 in exocytosis in MIN6 cells.

184 To investigate the possibility that BHLHE40 affects multiple steps during  
185 glucose-stimulated insulin secretion, we next examined glucose uptake in *Bhlhe40* KD  
186 and control MIN6 cells. Uptake of 2-NBDG, a fluorescent derivative of glucose, was  
187 decreased by hypoxia, but *Bhlhe40* KD did not affect 2-NBDG uptake in MIN6 cells  
188 (Figure 3I), indicating that BHLHE40 does not affect glucose uptake. In line with our  
189 previous study (9), ATP levels in MIN6 cells were decreased under hypoxic conditions,  
190 and the decrease of ATP levels was significantly restored by *Bhlhe40* KD (Figure 3J). In  
191 agreement with these results, under hypoxic conditions, the decreased mitochondrial mass  
192 was significantly increased by *Bhlhe40* KD in MIN6 cells (Figure 3K). Taken together,  
193 our results show that BHLHE40 affects at least two different steps, i.e., ATP generation  
194 and exocytosis, during insulin secretion.

195

#### 196 **BHLHE40 suppresses *Mafa* expression in $\beta$ -cells**

197 To further understand how BHLHE40 regulates insulin secretion, we performed  
198 RNA-seq analysis in control MIN6 cells and MIN6 cells overexpressing *Bhlhe40*.

199 Compared with control MIN6 cells, MIN6 cells overexpressing *Bhlhe40* showed 2630  
200 differentially expressed genes (1288 downregulated and 1342 upregulated; adjusted  $p <$   
201 0.01) (Figure 4A). Gene ontology analysis revealed that the downregulated genes  
202 included transcription genes with critical roles during insulin secretion, including *Mafa*,  
203 *Nkx2-2*, *Ppargc1a*, *Vdr*, *Nkx6-1*, and *Neurod1* (Figures 4, A and B). Quantitative real-  
204 time polymerase chain reaction (qRT-PCR) in independent samples confirmed the  
205 significant downregulation of *Mafa*, *Nkx2-2*, *Ppargc1a*, and *Vdr* expression by *Bhlhe40*  
206 overexpression (Figure 4C). To validate that BHLHE40 functions as a repressor of these  
207 genes, we next examined their expression in *Bhlhe40* KD MIN6 cells under hypoxic  
208 conditions. Hypoxia significantly decreased *Mafa*, *Ppargc1a*, *Vdr*, and *Nkx6-1* mRNA,  
209 but downregulation of *Mafa* was completely restored by KD of BHLHE40 (Figure 4D).  
210 At the protein level, suppression of MAFA by BHLHE40 and restoration of hypoxia-  
211 induced downregulation of MAFA by BHLHE40 deficiency were also detected (Figures  
212 4, E and F). MAFA regulates genes required for insulin exocytosis, including *Stxbp1*  
213 (encoding MUNC18-1), *Napa* (encoding N-ethylmaleimide-sensitive factor attachment  
214 protein), *Syt7* (encoding synaptotagmin 7), and *Stx1a* (encoding syntaxin1A) (28-33).  
215 Under hypoxic conditions, *Bhlhe40* KD also significantly restored the downregulation of  
216 *Stxbp1*, *Napa*, *Syt7*, and *Stx1a* (Figure 4G). MAFA plays a critical role in both glucose-

217 and KCl-stimulated insulin secretion (28, 34). Intriguingly, the glucose- and KCl-related  
218 decreased insulin secretion in hypoxic conditions was significantly restored by adeno-  
219 associated virus (AAV)-mediated overexpression of *Mafa* (Figures 4, H and I, and  
220 Supplemental Figure 4). These results indicate that BHLHE40 suppresses insulin  
221 secretion, at least in part, by reducing the expression of MAFA in  $\beta$ -cells.

222 Peroxisome proliferator-activated receptor- $\gamma$  coactivator 1- $\alpha$  (PGC-1 $\alpha$ ), which  
223 is encoded by *Ppargc1a*, regulates mitochondrial biogenesis and oxidative  
224 phosphorylation (35). Previous studies revealed that BHLHE40 acts as a transcriptional  
225 repressor of *Ppargc1a* (36, 37). Consistent with this finding, *Ppargc1a* expression was  
226 significantly downregulated by *Bhlhe40* overexpression in MIN6 cells, and the hypoxia-  
227 induced downregulation of *Ppargc1a* was recovered by KD of *Bhlhe40* (Figures 4, C and  
228 D), indicating that *Ppargc1a* is another target gene of BHLHE40 in MIN6 cells. In these  
229 experimental conditions, BHLHE40 KD did not affect the expression of *Nkx2-2*, *Vdr*,  
230 *Nkx6-1*, or *Neurod1* mRNAs (Figure 4D).

231

### 232 **BHLHE40 controls *Mafa* expression via two E-box sites in the enhancer region**

233 To further explore the mechanism by which BHLHE40 suppresses *Mafa*  
234 expression in  $\beta$ -cells, we performed a reporter gene assay with a reporter plasmid. We

235 included the mouse *Mafa* enhancer/promoter region (-10427 to +22 bp to transcriptional  
236 start site) because it shows maximum *Mafa* promoter activity in  $\beta$ -cells (38, 39). *Mafa*  
237 reporter gene activity was significantly decreased under hypoxic conditions, but the  
238 reduction was abolished by *Bhlhe40* KD (Figure 5A). BHLHE40 binds to E-box sequence  
239 (5'-CANNTG-3') to suppress its target genes. Screening of the JASPAR database (40)  
240 revealed four E-box sites (A, -9909/-9899; B, -8705/-8695; C, -6987/-6976; and D, -  
241 4949/4938, relative score > 0.9) within the -10427/+22 region (Figure 5B).  
242 Overexpression of *Bhlhe40* suppressed activity of the reporter gene in MIN6 cells, but  
243 mutation of the A or C site in the reporter gene abolished the reduction of transcriptional  
244 activity by BHLHE40 (Figure 5C). Consistent with this finding, suppression of the  
245 reporter gene activity by hypoxia also was attenuated by mutation of these two sites  
246 (Figure 5D). Furthermore, chromatin immunoprecipitation (ChIP) assay revealed  
247 enhanced binding of BHLHE40 to A and C sites in MIN6 cells under hypoxic conditions  
248 (Figure 5E). These results indicate that BHLHE40 suppresses *Mafa* expression by binding  
249 to the A or C site. BHLHE40 is reported to repress transcription of the target genes by  
250 recruiting histone deacetylase (HDAC; ref. 41, 42). However, treatment with trichostatin  
251 A (TSA), an HDAC inhibitor, failed to affect the reduced reporter gene activity in hypoxic  
252 MIN6 cells (Figure 5F).

253 The transcription factor pancreas/duodenum homeobox protein 1 (PDX1) was  
254 reported to regulate *Mafa* expression in  $\beta$ -cells by binding to the enhancer region (-8152  
255 to -7780 relative to the transcription start site) (38, 43). Therefore, we investigated  
256 whether BHLHE40 represses *Mafa* expression by inhibiting PDX1 binding. Intriguingly,  
257 the ChIP assay revealed that BHLHE40 significantly reduced PDX1 binding to the *Mafa*  
258 gene in MIN6 cells (Figure 5G). These results suggest that BHLHE40 controls *Mafa*  
259 expression, at least in part, by affecting the binding of PDX1.

260

#### 261 **Deficiency of BHLHE40 improves hyperglycaemia in *ob/ob* mice**

262 To evaluate the role of BHLHE40 *in vivo*, we generated  $\beta$ -cell-specific  
263 BHLHE40 knockout ( $\beta B40$ KO) mice by crossing Pdx1-Cre mice (44) with floxed  
264 *Bhlhe40* (*Bhlhe40<sup>fl/fl</sup>*) mice (Supplemental Figures 5, A and B). Body weight (Supplemental  
265 Figure 5C) and nonfasting blood glucose concentration (Supplemental Figure 5D) were  
266 similar in  $\beta B40$ KO and *Bhlhe40<sup>fl/fl</sup>* mice, and the intraperitoneal glucose tolerance test  
267 also showed no differences in blood glucose levels among Pdx1-Cre, *Bhlhe40<sup>fl/fl</sup>*, and  
268  $\beta B40$ KO mice (Figure 6A).

269 BHLHE40 negatively regulates insulin secretion, and BHLHE40 expression was  
270 markedly upregulated in *ob/ob* pancreatic islets (Figure 2I). We then investigated the

271 effects of  $\beta$ -cell-specific BHLHE40 deficiency in *ob/ob* mice ( $\beta B40KO:ob/ob$  mice). In  
272 these mice, BHLHE40 deficiency in  $\beta$ -cells had no effect on obesity (Figure 6B) or insulin  
273 sensitivity (Supplemental Figure 5E). However, the mice displayed better glucose  
274 tolerance than control *Bhlhe40<sup>fl/fl</sup>:ob/ob* (control:*ob/ob*) mice (Figures 6, C and D). In  
275 agreement with the results obtained in MIN6 cells, glucose-stimulated insulin secretion  
276 was significantly increased in  $\beta B40KO:ob/ob$  mice (Figure 6E). Insulin secretion by high  
277 glucose (Figure 6F) and KCl (Figure 6G) was also increased in  $\beta B40KO$  islets under  
278 hypoxic conditions. We measured the ATP content with 2.2mM and 22mM glucose under  
279 hypoxic conditions and found that ATP levels were significantly increased in  $\beta B40KO$   
280 islets compared with control islets (Figure 6H). There was no significant difference in the  
281 ratio of  $\beta$ -cell area to whole pancreas area between  $\beta B40KO:ob/ob$  and control:*ob/ob*  
282 mice (Figures 6, I and J), but stronger nuclear immunostaining of MAFA was detected in  
283  $\beta B40KO:ob/ob$  mice (Figures 6, K and L). Lastly, the increased expression of *Mafa*,  
284 *Stxbp1*, *Napa*, *Syt7*, *Stx1a*, and *Ppargc1a* in  $\beta B40KO:ob/ob$  islets was confirmed by qRT-  
285 PCR (Figure 6M). Taken together, the results show that BHLHE40 deficiency improves  
286 glucose tolerance in *ob/ob* mice by enhancing insulin secretion.

287

288



## 289 **DISCUSSION**

290           Adaptation to hypoxia involves 3 major responses: increased glycolysis to cope  
291 with ATP depletion, increased oxygen delivery, and inhibition of energy-demanding  
292 processes such as gene transcription (17). HIF transcriptional factors are known to play  
293 central roles in glycolytic ATP production and oxygen delivery, but the mechanisms  
294 underlying transcriptional repression in hypoxia are poorly understood. By screening  
295 hypoxia-induced genes in mouse and human islets and MIN6 cells, we showed that the  
296 transcriptional repressor BHLHE40 is highly induced in hypoxic  $\beta$ -cells. We also  
297 demonstrated that BHLHE40 negatively regulates insulin secretion by suppressing  
298 transcription of *Mafa*. Hypoxia is involved in  $\beta$ -cell dysfunction, and the contribution of  
299 HIF-1 to this process is well established (7, 14-16). However, our present findings present  
300 a novel scenario in which hypoxia decreases insulin secretion by inducing BHLHE40  
301 (Figure 7).

302           BHLHE40 was previously reported to suppress transcription of target genes by  
303 recruiting HDACs (37, 45). In contrast, we found that TSA treatment did not relieve the  
304 BHLHE40-mediated repression of *Mafa*, indicating that *Mafa* repression by BHLHE40  
305 is independent of the recruitment of HDAC. On the other hand, we demonstrated that  
306 BHLHE40 inhibits the binding of PDX1 to the critical enhancer region of *Mafa*.

307 Repressors are reported to regulate transcription by interacting with activator proteins  
308 (46). BHLHE40 might suppress *Mafa* transcription by interacting with PDX1.  
309 Alternatively, BHLHE40 might change DNA conformations by recruiting chromatin-  
310 remodeling factors. The family of large Maf proteins comprises MAFA, MAFB, and  
311 MAF (c-Maf). Intriguingly, recent studies demonstrated that BHLHE40 represses the  
312 expression of *Mafb* and *Maf* mRNAs in macrophages (47). Thus, BHLHE40 seems to be  
313 a common repressor of the large-Maf family. Further studies are necessary to clarify the  
314 mechanism by which BHLHE40 suppresses these genes. Moreover, we also revealed that  
315 BHLHE40 suppresses transcription of *Ppargc1a* and decreases ATP levels in  $\beta$ -cells.  
316 Because PGC-1 $\alpha$  plays important roles in ATP production (48, 49), it is plausible that the  
317 decreased expression of PGC-1 $\alpha$  may be involved in the reduced ATP levels and impaired  
318 insulin secretion under hypoxic conditions.

319 In the present study, we showed that approximately 5% of genes were  
320 downregulated in hypoxic islets. In addition to BHLHE40, we also found an increased  
321 expression of ATF3 in  $\beta$ -cells in hypoxia. Previously, ATF3 was reported to function as a  
322 transcriptional repressor and to suppress genes related to glucose metabolism, such as  
323 *Irs2*, *Nrf1*, and *Pparg* (50, 51). Thus, hypoxia might affect  $\beta$ -cell function through not  
324 only BHLHE40 but also other transcriptional repressors, such as ATF3.

325 In conclusion, we identified BHLHE40 as a novel hypoxia-induced  
326 transcriptional repressor that negatively regulates insulin secretion in  $\beta$ -cells. Because  $\beta$ -  
327 cell dysfunction in type 2 diabetes is progressive, new approaches to slow the progression  
328 are needed. Inhibition of BHLHE40 might be a new therapeutic strategy for preventing  
329 the  $\beta$ -cell dysfunction by hypoxia.

330

## 331 **METHODS**

332 **Mouse models.** C57B6 wild-type (WT), *ob/ob*, and *db/db* mice were purchased from  
333 KBT Oriental Co., Ltd. (Saga, Japan). Mice carrying the *Bhlhe40<sup>tm1a(KOMP)Wtsi</sup>* allele  
334 (C57BL/6NTac-Bhlhe40<sup>tm1a(KOMP)Wtsi</sup>/WtsiPh, EM:09819) were obtained from the  
335 European Conditional Mouse Mutagenesis Program (EUCOMM) and crossed with *FLPe*  
336 mice (B6-Tg(CAG-FLPe)<sup>36</sup>, RBRC01834, RIKEN BRC, Ibaraki, Japan) to remove a  
337 LacZ reporter and a Neo cassette flanked by two Frt sites. To achieve a *Bhlhe40* deletion  
338 in  $\beta$ -cells, *Bhlhe40<sup>fl/fl</sup>* mice were further crossed with Pdx1-Cre mice (gift from Dr.  
339 Douglas A. Melton).  $\beta$ -cell-specific *Bhlhe40* knockout mice on *ob/ob* background were  
340 generated by crossing with *Bhlhe40<sup>fl/fl</sup>:ob/+* mice and Pdx1-Cre:*Bhlhe40<sup>fl/fl</sup>:ob/+* mice.  
341 Mice were housed under a 12-hour light/dark cycle with free access to water and normal  
342 chow (CE-2; CLEA, Tokyo, Japan). Room temperature was maintained at  $22 \pm 1-2^\circ\text{C}$ .

343

344 **Human pancreatic islets.** Human islets were commercially purchased from Prodo  
345 Laboratories (Irvine, CA). The cadaveric donor had no history of diabetes (32-year-old  
346 male; BMI, 25.1; HbA1c, 5.1%). Islets were cultured according to the Prodo Laboratories  
347 instructions.

348

349 **Cell lines.** MIN6 cells were gifts from Jun-ichi Miyazaki (Osaka University). They were  
350 maintained in Dulbecco's modified Eagle's medium (DMEM) supplemented with 10%  
351 (v/v) fetal bovine serum (FBS), 0.1% (v/v) penicillin/streptomycin (P/S), and 50 $\mu$ M  $\beta$ -  
352 mercaptoethanol at 37°C in 5% CO<sub>2</sub>, 95% air. For the hypoxic cell culture, a multi-gas  
353 incubator (APM-300; ASTEC, Fukuoka, Japan) was used. Retroviral packaging cell line  
354 Platinum-E (Plat-E; RV-101) cells were purchased from Cell Biolabs, Inc. (San Diego,  
355 CA). They were maintained in DMEM supplemented with 10% (v/v) FBS and 0.1% (v/v)  
356 P/S at 37°C in 5% CO<sub>2</sub>, 95% air. 293AAV cells were purchased from Cell Biolabs Inc.  
357 (AAV-100). They were maintained in DMEM with sodium pyruvate supplemented with  
358 10% (v/v) FBS, 1x Glutamax, 1x Opti-MEM, and 0.1% (v/v) P/S at 37°C in 5% CO<sub>2</sub>,  
359 95% air.

360

361 **Plasmids.** The HA-tagged mouse *Bhlhe40* coding sequence was excised from a  
362 pCAGGS-DEC1 plasmid (RDB08473, Riken, Saitama, Japan; ref. 52) and subcloned into  
363 pcDNA3.1 and pMXs-Puro Retroviral vector (RTV-012, Cell Biolabs, Inc.). For  
364 knockdown experiments, oligonucleotide encoding *Bhlhe40* short hairpin RNA (shRNA;  
365 target sequence: 5'-GCACGTGAAAGCATTGACA-3'; ref. 53) and *Hif1 $\beta$*  shRNA (target  
366 sequence: 5'-GGACAGAGATCCAAGGTTT-3') were cloned into the pSIREN-RetroQ  
367 expression vector (631526; Clontech Laboratories Inc., Mountain View, CA). The FLAG-  
368 tagged mouse *Pdx1* coding sequence was amplified by PCR and subcloned into a pMXs-  
369 Neo Retroviral vector (RTV-011, Cell Biolabs, Inc.). pGL3-basic-MafA plasmid (-  
370 10427/+22 from transcription start site) was previously reported (39). The pGL3-basic-  
371 MafA plasmids with single deletion of the E-box site at -9910/-9899 (A;  
372 GAAAAATGCTG), -8706/-8695 (B; TGAAAATGATT), or -6987/-6976 (C;  
373 GGAAAATGCCT) were generated with a KOD-Plus Mutagenesis Kit (SMK-101,  
374 TOYOBO, Osaka, Japan). The truncated pGL3-basic-MafA plasmid (-5811/+22) was  
375 generated by *Bgl*II digestion and re-ligation. The mouse *Mafa* coding sequence was  
376 amplified by PCR and subcloned into pAAV-MCS (VPK-410, Cell Biolabs, Inc.).  
377  
378 **MIN6 cells stably overexpressing/silencing a target gene.** To generate stable

379 overexpression cell lines, retroviral vectors (pMx-Puro-HA-*Bhlhe40*, pMx-Puro Control,  
380 pMx-Neo FLAG-*Pdx1* or pMx-Neo Control plasmid) were transfected into Plat-E cells  
381 with JetPRIME transfection reagent (114-15, Polyplus, New York, NY), and MIN6 cells  
382 were infected with the respective retroviruses and selected by incubation with puromycin  
383 (5 µg/ml) for 2 days or G418 (500 µg/ml) for 4 weeks. For stable knockdown of *Bhlhe40*,  
384 pSIREN-RetroQ-*Bhlhe40* or pSIREN-RetroQ-control vector was transfected into Plat-E  
385 cells, and MIN6 cells were infected with the retroviruses and selected by incubation with  
386 puromycin (5 µg/ml) for 2 days.

387

388 **AAV-*Mafa* preparation.** 293AAV cells were plated onto 10-cm dishes. At 80%  
389 confluency, cells were transfected with 2 µg/dish pAAV-DJ, 3 µg/dish pHelper, and either  
390 2 µg/dish pAAV-GFP or pAAV-*Mafa* with JetPRIME transfection reagent. Three days  
391 after transfection, AAV-GFP and AAV-*Mafa* were purified with the AAV pro Extraction  
392 Solution Kit (6235, Takara, Shiga, Japan), and the titers were determined with a Quick  
393 Titer AAV Quantification Kit (VPK-145, Cell Biolabs, Inc.) according to the  
394 manufacturer's instructions.

395

396 **Isolation of mouse islets.** Mice were euthanized by cervical dislocation and subjected to

397 bile duct cannulation and digestion of the pancreas with a mixture of collagenase P (11-  
398 249-002-001, Roche, Basel, Switzerland), hyaluronidase (H3506; Sigma-Aldrich, St.  
399 Louis, MO), and protease inhibitor cocktail (Nacalai Tesque, Kyoto, Japan) for 25 to 30  
400 minutes in a warm (37°C) water bath. Isolated islets were collected manually. Islets were  
401 maintained in RPMI-1640 supplemented with 10% (v/v) FBS, 0.1% (v/v) P/S, 50µM β-  
402 mercaptoethanol, 10mM HEPES, and 1mM sodium pyruvate at 37°C in 5% CO<sub>2</sub>, 95%  
403 air.

404

405 **qRT-PCR.** MIN6 cells were homogenized in Sepasol-RNA I reagent (09379-55, Nacalai  
406 Tesque), and RNA was manually isolated by phenol-chloroform extraction and ethanol  
407 precipitation. RNA from isolated islets was prepared with the RNeasy Micro Kit (74004,  
408 QIAGEN, Hilden, Germany) according to the manufacturer's instructions. cDNA was  
409 synthesized with a Prime Script RT Reagent Kit (RR047A, Takara Bio Inc., Shiga, Japan).  
410 qRT-PCR was performed with SYBR Premix Ex TaqII (RR820A, Takara Bio Inc.) in an  
411 ABI 7300 thermal cycler (Applied Biosystems, Foster City, CA). All data were  
412 normalized to *Actb* or *Tbp*. The primers for this study are listed in Supplemental Table 1.  
413  
414 **RNA-seq analysis.** RNA was extracted with the RNeasy Micro Kit (74004, QIAGEN)

415 according to the manufacturer's instructions. For Figure 1 samples, sequencing libraries  
416 were prepared with a NEBNext Ultra II Directional RNA Library Prep Kit (7765L, New  
417 England Biolabs, Ipswich, MA), and samples were sequenced on an Illumina NextSeq  
418 500 platform in 76bp single-end reads. For Figure 4 samples, sequencing libraries were  
419 prepared with a NEBNext Ultra II RNA Library Prep Kit (E7770, New England Biolabs)  
420 and samples were sequenced on an Illumina NovaSeq 6000 platform in 150bp paired-end  
421 reads. For reanalysis of RNA-seq data of *db/db* mice islets (accession number: GSE  
422 107489), raw RNA-seq data were downloaded from NCBI Sequence Read Archive and  
423 converted to the fastq format with SRA-Tools (v2.10.9). Reads were trimmed for  
424 universal Illumina adaptors with TrimGalore (v0.6.5)  
425 ([http://www.bioinformatics.babraham.ac.uk/projects/trim\\_galore/](http://www.bioinformatics.babraham.ac.uk/projects/trim_galore/)) and then mapped to  
426 GENCODE 36 genome sequence (for human) or M25 genome sequence (for mouse) with  
427 HISAT2 (v2.2.1; ref. 54). Mapped reads were sorted and converted to a binary  
428 alignment/map format with SAMtools (v1.11; ref. 55). Gene assembly and quantification  
429 were performed with Stringtie (v2.1.4; ref. 56), and gene-level count matrixes were  
430 generated with python script prepDE.py3  
431 (<http://ccb.jhu.edu/software/stringtie/dl/prepDE.py3>). Differentially expressed genes  
432 (DEGs) were determined with DESeq2 (v1.28.0; ref. 57). DEGs (adjusted p-value < 0.01)



433 were used for gene ontology analysis with David (v6.8; ref. 58, 59). Raw and processed  
434 RNA sequencing were deposited in the Gene Expression Omnibus (GEO) under  
435 accession number GSE202603.

436

437 **Screening for hypoxia-induced genes associated with transcriptional repression.**

438 Hypoxia-induced genes were defined as genes with an adjusted p value of less than 0.05  
439 and a fold change (hypoxia/normoxia) greater than 2 in DESeq2 outputs. To identify  
440 hypoxia-induced genes that are commonly listed in mouse and human islets and MIN6  
441 cells and are related to transcriptional repression, DESeq2 outputs in each group were  
442 processed as follows: For human islets, human-to-mouse Ensembl gene identifiers (IDs)  
443 conversion was carried out with Ensembl BioMart; and for MIN6 cells and mouse islets,  
444 only genes with mouse Ensembl gene IDs that can be mapped to those in human were  
445 selected. After this gene IDs conversion and gene filtering, overlapped genes were  
446 determined. Genes associated with transcriptional repression were manually selected out  
447 of the overlapped genes based on gene ontology annotations against each gene (obtained  
448 from Ensembl BioMart).

449

450 **GSEA.** Gene set enrichment analysis was performed with GSEA (v4.03; ref. 60) for “pre-

451 ranked” analyses, with the fold change between normoxia samples and hypoxia samples  
452 as the input. Mouse Ensembl IDs were converted to be compatible with the human  
453 annotations of the MSigDB gene lists by using a Mouse ENSEMBL Gene ID to Human  
454 Orthologs MSigDB.v7.4.chip.

455

456 **Western blotting.** Cells were lysed in RIPA buffer (50mM Tris-HCl [pH 8.0], 150mM  
457 NaCl, 0.1% sodium dodecyl sulfate [SDS], 1% NP-40, 5mM EDTA, and 0.5% sodium  
458 deoxycholate) with a protease inhibitor cocktail. Total proteins were separated by SDS  
459 polyacrylamide gel electrophoresis, transferred to polyvinylidene difluoride membranes  
460 (Immuno-P; Millipore, Bedford, MA) and then probed with the primary antibody. After  
461 incubation with the horseradish peroxidase (HRP)-conjugated secondary antibodies, the  
462 HRP signals were visualized by using Chemi-Lumi One Super (02230-30, Nacalai  
463 Tesque) and a ChemiDoc™ Imaging System (Bio-Rad Laboratories, Hercules, CA). The  
464 primary antibodies used in this study were anti- $\beta$ -actin antibody (M177-3, MBL), anti-  
465 BHLHB2 antibody (H00008553-M01, Abnova), anti-MafA antibody (A300-611A,  
466 Bethyl Laboratories, Montgomery, TX), anti-glyceraldehyde-3-phosphate dehydrogenase  
467 (GAPDH) antibody (2118, Cell Signaling Technology, Danvers, MA), anti-HIF1 $\alpha$   
468 antibody (NB100-479, Novus Biologicals, Centennial, CO), and anti-HIF1 $\beta$  antibody

469 (5537, Cell Signaling Technology).

470

471 **Insulin secretion assay and insulin content in MIN6 cells.** MIN6 cells were seeded in  
472 a 24-well plate. In Figures 3A, 3B, and 3D, cells were incubated in 20% or 5% O<sub>2</sub> for 24  
473 hours before assay. Cells were pre-conditioned in low-glucose (2.2mM) Krebs-Ringer-  
474 bicarbonate HEPES (KRBH) buffer (120mM NaCl, 4.7mM KCl, 1.2mM KH<sub>2</sub>PO<sub>4</sub>,  
475 2.4mM CaCl<sub>2</sub>, 1.2mM MgCl<sub>2</sub>, 20mM NaHCO<sub>3</sub>, 10mM HEPES, and 0.5% (v/v) BSA) for  
476 1 hour. Cells were washed once with low-glucose KRBH and incubated in low-glucose  
477 KRBH for 1 hour, and the supernatant was collected. Then, cells were stimulated in high-  
478 glucose (22mM) KRBH or low-glucose + KCl (30mM) KRBH for 1 hour, and the  
479 supernatant was collected. Next, cells were lysed in cell lysis buffer, and the protein  
480 concentration was measured with a Pierce BCA Protein Assay Kit (23225, Thermo Fisher  
481 Scientific, Waltham, MA) to normalize the insulin level. To measure insulin content,  
482 MIN6 cells were pelleted and resuspended in acid-ethanol (1.5% HCl in 70% EtOH),  
483 rotated overnight at 4°C and neutralized with 1M Tris-HCl (pH 7.5; 1:1). The insulin  
484 concentration was determined with a mouse insulin enzyme-linked immunosorbent assay  
485 (ELISA; TMB) kit (AKRIN-011T; Shibayagi Co., Ltd., Gunma, Japan). A hypoxia  
486 chamber glove box (Creative Bio Station: CBS-120; ASTEC) was used to achieve

487 continuous hypoxic conditions during the assay.

488

489 **Insulin secretion assay in mouse islets.** The islets isolated from Ctrl and  $\beta$ B40KO mice  
490 were cultured in 5% O<sub>2</sub> for 24 hours. Then, they were preincubated for 30 minutes in  
491 KRBH buffer containing 2.2mM glucose. For glucose challenge, they were incubated in  
492 KRBH buffer containing 2.2mM or 22mM glucose for 30 minutes, and the supernatant  
493 was collected; and for KCl challenge, they were incubated in KRBH buffer containing  
494 2.2mM or 2.2mM glucose plus 30mM KCl for 30 minutes, and the supernatant was  
495 collected. The insulin concentration was determined with a mouse insulin ELISA (TMB)  
496 kit (AKRIN-011T and AKRIN-011S; Shibayagi Co., Ltd.). A hypoxia chamber glove box  
497 (Creative Bio Station: CBS-120; ASTEC) was used to achieve continuous hypoxic  
498 conditions during the assay.

499

500 **Cell proliferation assay.** Before the assay, Ctrl or *Bhlhe40* KD MIN6 cells were seeded  
501 in a 96-well plate at  $2 \times 10^4$  cells/well, incubated overnight and transferred to 20% or 5%  
502 O<sub>2</sub>. Cells were counted at 0, 24, 48, and 96 hours with a Cell Counting Kit-8 (343-07623,  
503 Dojindo, Kumamoto, Japan), and the absorbance (450/655) was measured by an iMark  
504 microplate reader (Bio-Rad Laboratories).

505

506 **Cell death assay.** Before the assay, Ctrl or *Bhlhe40* KD MIN6 cells were transferred to  
507 and cultured in 20% or 5% O<sub>2</sub> for 24 hours. Then, they were incubated in 0.5 µg/ml PI  
508 (341-07881, Dojindo) for 10 minutes, after which flow cytometric analyses were  
509 performed with a FACSCalibur (BD Biosciences, Franklin Lakes, NJ) and FlowJo  
510 software (Tomy Digital Biology, Tokyo, Japan).

511

512 **Calcium assay.** Ctrl or *Bhlhe40* OE MIN6 cells were plated on glass-bottomed culture  
513 dishes (627871, Greiner Bio-One, Frickenhausen, Germany). The cells were preincubated  
514 with KRBH buffer for 45 minutes and then incubated with KRBH buffer containing  
515 2.2mM glucose, 2µM Fluo4-AM (F311, Dojindo), 0.02% Pluronic F-127 (P2443, Sigma-  
516 Aldrich), 2.5mM probenecid (162-26112, Wako Pure Chemical Industries, Ltd.), and  
517 Hoechst 33258 (343-07961, Dojindo) for 30 minutes, after which the buffer was replaced  
518 with dye-free KRBH buffer. To perform the KCl challenge, buffer was changed by hand-  
519 aspirating it and gently adding an equal amount of KRBH buffer containing 2.2mM  
520 glucose and 30mM KCl back into the dish with a micropipette Time-series images were  
521 acquired every 10 seconds with a fluorescent microscope (BZ-X700; Keyence, Osaka,  
522 Japan) and analyzed with Keyence software.

523

524 **hGH secretion assay.** Ctrl or *Bhlhe40* KD MIN6 were transfected with either pcDNA3-  
525 empty or pcDNA3-hGH. At 24 hours after transfection, cells were transferred to and  
526 cultured in 20% or 5% O<sub>2</sub> for a further 24 hours. Cells were preincubated in glucose-free  
527 KRBH for 15 minutes and then incubated in KRBH with or without KCl (30mM) for 30  
528 minutes, and the supernatant was collected. Cells were then lysed in cell lysis buffer, and  
529 the protein concentration was measured with a Pierce BCA Protein Assay Kit (23225,  
530 Thermo Fisher Scientific) to normalize the hGH level. The hGH concentration was  
531 measured with Human Growth Hormone ELISA kit (ab190811, Abcam, Cambridge, UK).

532

533 **Glucose uptake assay.** Before the assay, Ctrl or *Bhlhe40* KD MIN6 cells were transferred  
534 to and incubated in 20% or 5% O<sub>2</sub> for 24 hours. Cells were preincubated in KRBH for 15  
535 minutes and then incubated in KRBH containing 200μM 2-NBDG (23002-v, Peptide  
536 Institute, Inc., Osaka, Japan) plus 22mM glucose for 15 minutes, after which flow  
537 cytometric analyses were performed with FACSCalibur (BD Biosciences) and FlowJo  
538 software (Tomy Digital Biology).

539

540 **Mitochondrial mass assay.** Before the assay, Ctrl or *Bhlhe40* KD MIN6 cells were

541 transferred to and incubated in 20% or 5% O<sub>2</sub> for 24 hours. Then, cells were incubated in  
542 2nM nonyl acridine orange (A-1372, Invitrogen, Carlsbad, CA) for 15 minutes, after  
543 which flow cytometric analyses were performed with FACSCalibur (BD Biosciences) and  
544 FlowJo software (Tomy Digital Biology).

545

546 **Luciferase assay.** MIN6 cells were transiently transfected with firefly luciferase plasmid  
547 (either pGL3-basic-MafA or its derivatives) and renilla luciferase plasmid (pRL-SV40)  
548 with jetPRIME transfection reagent (114-15, Polyplus). For *Bhlhe40* overexpression  
549 experiments, *Bhlhe40* expression plasmids (either pcDNA3.1-empty or pcDNA3.1-  
550 *Bhlhe40*) were additionally transfected. Forty-eight hours after transfection, cells were  
551 lysed and assayed with firefly luciferase and renilla luciferase substrates in the Dual-  
552 Luciferase Reporter Assay System (E1980, Promega). Firefly luciferase activity (RLU1)  
553 was normalized to renilla luciferase activity (RLU2). For hypoxia experiments, cells were  
554 transferred to 20% or 5% O<sub>2</sub> for 24 hours before the luciferase activities were measured.

555

556 **ChIP assay.** MIN6 cells were fixed in 1% formaldehyde for 10 minutes at room  
557 temperature, and then the reaction was quenched by 150mM glycine for 5 minutes. The  
558 fixed cells were incubated in 0.5% Nonidet P-40 lysis buffer for 15 minutes on ice, and

559 the nuclei were pelleted and incubated in SDS lysis buffer (50mM Tris-HCl [pH 8.0], 1%  
560 SDS, 10mM EDTA). Chromatin was then sheared with a Bioruptor sonicator (C30010016,  
561 Diagenode, Seraing, Belgium) by 10 cycles of sonication at 30 seconds on, 30 seconds  
562 off. The sheared chromatin was diluted 5-fold in ChIP dilution buffer (50mM Tris-HCl  
563 [pH 8.0], 167mM NaCl, 1.1% Triton X-100, and 0.11% sodium deoxycholate) and then  
564 incubated in Dynabeads protein A (1001D, Invitrogen) and protein G (1003D, Invitrogen)  
565 for 1 hour at 4°C. After removing the beads, the chromatin was incubated in 4 µg of anti-  
566 Bhlhe40 antibody (NB100-1800, Novus Biologicals) or control IgG (2729, Cell Signaling  
567 Technology) overnight at 4°C. The antibody-protein complexes were isolated by  
568 incubation with magnetic beads (Invitrogen Dynabeads protein A and protein G) for 6  
569 hours at 4°C. Then, samples were sequentially washed with low-salt RIPA buffer (50mM  
570 Tris-HCl [pH 8.0], 150mM NaCl, 1mM EDTA, 0.1% SDS, 1% Triton X-100, and 0.1%  
571 sodium deoxycholate), high-salt RIPA buffer (50mM Tris-HCl [pH 8.0], 500mM NaCl,  
572 1mM EDTA, 0.1% SDS, 1% Triton X-100, and 0.1% sodium deoxycholate), LiCl wash  
573 buffer (10mM Tris-HCL [pH 8.0], 250mM LiCl, 1mM EDTA, 0.5% Nonidet P-40, and  
574 0.5% sodium deoxycholate), and Tris-EDTA buffer and finally eluted and reversely cross-  
575 linked in ChIP direct elution buffer (50mM Tris-HCl [pH 8.0], 5mM EDTA, and 0.5%  
576 SDS) overnight at 65°C. DNA was then extracted and collected by phenol-chloroform



577 extraction and ethanol precipitation. DNA was amplified by qRT-PCR with SYBR Premix  
578 Ex Taq II (RR820A, Takara) in ABI 7300 thermal cycler (Applied Biosystems) with the  
579 primers listed in Supplemental Table 1.

580

581 **Metabolic analysis of mice.** Male 6- to 12-week-old mice were used for metabolic  
582 analysis. For the glucose tolerance test, mice were fasted overnight. After intraperitoneal  
583 glucose administration (2 g/kg for wildtype background, 1 g/kg for *ob/ob* background),  
584 blood glucose levels were measured at 0, 15, 30, 60, 90, and 120 minutes. For the insulin  
585 tolerance test, mice were fasted for 4 hours. After intraperitoneal insulin administration  
586 (1 unit/kg for wildtype background, 3 units/kg for *ob/ob* background), blood glucose  
587 levels were measured at 0, 30, 60, 90, and 120 minutes. For the glucose-stimulated insulin  
588 secretion assay, mice were fasted overnight. After intraperitoneal administration of 3 g/kg  
589 glucose, blood samples were collected at 0 and 15 minutes. The plasma insulin level was  
590 determined with a mouse insulin ELISA (TMB) kit (AKRIN-011S; Shibayagi Co., Ltd.).

591

592 **Immunohistochemistry and  $\beta$ -cell mass assessment.** Pancreas tissues from mice were  
593 fixed with 10% (v/v) neutral buffered formalin (060-01667, Wako Pure Chemical  
594 Industries, Ltd.) for 16 to 18 hours at 4°C. Fixed samples were embedded in paraffin, cut

595 into 4- $\mu\text{m}$  cross-sections, mounted on MAS-coated slides (Matsunami Glass, Osaka,  
596 Japan). The deparaffinized sections were subjected to antigen retrieval (110°C, 20  
597 minutes) with HistoVT One (L6F9587, Nacalai Tesque) and stained with the following  
598 primary antibodies: anti-insulin antibody (A0564, 1:400; Dako, Santa Clara, CA), anti-  
599 glucagon antibody (ab92517, 1:400; Abcam), anti-DEC1/BHLHE40 antibody (NB100-  
600 1800, 1:100; Novus Biologicals), and anti-MafA antibody (A300-611A, 1:100; Bethyl  
601 Laboratories). After reaction with fluorescent dye-conjugated secondary antibodies,  
602 fluorescent signals were captured with an all-in-one fluorescent microscope (BZ-X700;  
603 Keyence). The total islet area ( $\mu\text{m}^2$ ) composed of insulin- and glucagon-stained cells was  
604 measured by Keyence software, and the ratio of the total islet area to the total pancreas  
605 area was calculated.

606

607 **Statistics.** The significance of differences was assessed by unpaired two-sided Student's  
608 *t* tests, unless stated otherwise. All data are presented as means  $\pm$  SEM. No statistical  
609 analysis was used to predetermine the sample size.

610

611 **Study approval.** The handling and killing of mice were performed in compliance with  
612 the animal care guidelines of Kumamoto University. All animal experiments were

613 conducted in accordance with the guidelines of the Institutional Animal Committee of  
614 Kumamoto University and were approved by the Kumamoto University Ethics Review  
615 Committee for Animal Experimentation (ID: A29-001, A 2019-048, A 2021-001). Human  
616 islets experiments were approved by the Ethical Committee of Kumamoto University  
617 Graduate School of Medical Sciences (No. 2389).

618

#### 619 **AUTHOR CONTRIBUTIONS**

620 T.T., Y.S. and K.Y. conceived and designed the work; T.T. and Y.S. obtained the data; T.T.,  
621 Y.S., T.Y., T.M., and K.Y. analyzed the data; T.T., Y.S. and K.Y. drafted the manuscript;  
622 All authors reviewed the results and approved the final version of the manuscript.

623

#### 624 **ACKNOWLEDGEMENT**

625 We thank Dr. Douglas A. Melton (Harvard University) for providing Pdx1-Cre mice and  
626 Dr. Shingo Usuki (Kumamoto University) for his technical support. We also thank the  
627 members of Dr. Yamagata's laboratory for their technical assistance and discussions. This  
628 study was supported by Grants-in-Aid for Scientific Research (B) (19H03711 and  
629 22H03129; K.Y.), by a Grant-in-Aid for Challenging Research (Exploratory) (19K22639;  
630 K.Y.), and by a Grant-in-Aid for Scientific Research (C) (19K09008; Y.S.); by grants from

631 the Takeda Science Foundation (K.Y. and Y.S.); and by grants from the program for  
632 Leading Graduate Schools HIGO (T.T.) and Center for Metabolic Regulation of Healthy  
633 Aging (T.T.).

634

## 635 REFERENCES

636 1. Prentki, M., Nolan, C.J. Islet beta cell failure in type 2 diabetes. *J Clin Invest.*  
637 2006;116(7): 1802-12.

638

639 2. Kahn, S.E. et al. Pathophysiology and treatment of type 2 diabetes: perspectives on  
640 the past, present, and future. *Lancet.* 2014;383(9922):1068-83.

641

642 3. Hudish, L.I. et al.  $\beta$  Cell dysfunction during progression of metabolic syndrome to  
643 type 2 diabetes. *J Clin Invest.* 2019;129(10):4001-4008.

644

645 4. Sato, Y. et al. Cellular hypoxia of pancreatic beta-cells due to high levels of oxygen  
646 consumption for insulin secretion in vitro. *J Biol Chem.* 2011;286(14):12524-32.

647

648 5. Bensellam, M. et al. Glucose-induced O<sub>2</sub> consumption activates hypoxia inducible

649 factors 1 and 2 in rat insulin-secreting pancreatic beta-cells. *PLoS One*  
650 2012;7(1):e29807.

651

652 6. Zheng, X. et al. Acute hypoxia induces apoptosis of pancreatic  $\beta$ -cell by activation  
653 of the unfolded protein response and upregulation of CHOP. *Cell Death Dis.*  
654 2012;3(6): e322.

655

656 7. Ilegems, E. et al. HIF-1 $\alpha$  inhibitor PX-478 preserves pancreatic  $\beta$  cell function in  
657 diabetes. *Sci Transl Med.* 2022;14(638):eaba9112.

658

659 8. Kitamura, T. The role of FOXO1 in  $\beta$ -cell failure and type 2 diabetes mellitus. *Nat*  
660 *Rev Endocrinol.* 2013;9(10):615-23.

661

662 9. Sato, Y. et al. Moderate hypoxia induces  $\beta$ -cell dysfunction with HIF-1-independent  
663 gene expression changes. *PLoS One.* 2014;9(12):e114868.

664

665 10. Gerber, P.A., Rutter, G.A. The Role of Oxidative Stress and Hypoxia in Pancreatic  
666 Beta-Cell Dysfunction in Diabetes Mellitus. *Antioxid Redox Signal.* 2017;26(10):501-

667 518.

668

669 11. Catrina, S.B., Zheng, X. Hypoxia and hypoxia-inducible factors in diabetes and its  
670 complications. *Diabetologia*. 2021;64(4):709-716.

671

672 12. Lee, P. et al. Cellular adaptation to hypoxia through hypoxia inducible factors and  
673 beyond. *Nat Rev Mol Cell Biol*. 2020;21(5):268-283.

674

675 13. Gunton, J.E. Hypoxia-inducible factors and diabetes. *J Clin Invest*.  
676 2020;130(10):5063-5073.

677

678 14. Zehetner, J. et al. pVHL is a regulator of glucose metabolism and insulin secretion in  
679 pancreatic  $\beta$  cells. *Genes Dev*. 2008;22(22):3135-46.

680

681 15. Cantley, J. et al. Deletion of the von Hippel-Lindau gene in pancreatic beta cells  
682 impairs glucose homeostasis in mice. *J Clin Invest*. 2009;119(1):125-35.

683

684 16. Puri, S. et al. A role for von Hippel-Lindau protein in pancreatic beta-cell function.

685 *Diabetes*. 2009;58(2):433-41.

686

687 17. Cavadas, M.A.S. et al. The regulation of transcriptional repression in hypoxia. *Exp*

688 *Cell Res*. 2017;356(2):173-181.

689

690 18. St-Pierre, B. et al. Stra13 homodimers repress transcription through class B E-box

691 elements. *J Biol Chem*. 2002;277(48):46544-51.

692

693 19. Görlach, A. et al. Reactive oxygen species, nutrition, hypoxia and diseases: Problems

694 solved? *Redox Biol*. 2015;6:372-385.

695

696 20. Sato, Y. et al. Hypoxia reduces HNF4 $\alpha$ /MODY1 protein expression in pancreatic  $\beta$ -

697 cells by activating AMP-activated protein kinase. *J Biol Chem*. 2017;292(21):8716-

698 8728.

699

700 21. Yun, Z. et al. Inhibition of PPAR gamma 2 gene expression by the HIF-1-regulated

701 gene DEC1/Stra13: a mechanism for regulation of adipogenesis by hypoxia. *Dev Cell*.

702 2002;2(3):331-41.

703

704 22. Miyazaki, K. et al. Identification of functional hypoxia response elements in the  
705 promoter region of the DEC1 and DEC2 genes. *J Biol Chem.* 2002;277(49):47014-  
706 21.

707

708 23. Ivanova, A. et al. STRA13 expression and subcellular localisation in normal and  
709 tumour tissues: implications for use as a diagnostic and differentiation marker. *J Med*  
710 *Genet.* 2005;42(7):565-76.

711

712 24. Sato, F. et al. DEC1 and DEC2 Crosstalk between Circadian Rhythm and Tumor  
713 Progression. *J Cancer.* 2016;7(2):153-9.

714

715 25. Rorsman, P., Renström, E. Insulin granule dynamics in pancreatic beta cells.  
716 *Diabetologia.* 2003;46(8):1029-45.

717

718 26. Coppola, T. et al. Disruption of Rab3-calmodulin interaction, but not other effector  
719 interactions, prevents Rab3 inhibition of exocytosis. *EMBO J.* 1999;18(21):5885-91.

720



- 721 27. Fukui, K. et al. The HNF-1 target collectrin controls insulin exocytosis by SNARE  
722 complex formation. *Cell Metab.* 2005;2(6):373-84.  
723
- 724 28. Hang, Y. et al. The MafA transcription factor becomes essential to islet  $\beta$ -cells soon  
725 after birth. *Diabetes.* 2014;63(6):1994-2005.  
726
- 727 29. Cataldo, L.R. et al. MAFA and MAFB regulate exocytosis-related genes in human  $\beta$ -  
728 cells. *Acta Physiol (Oxf).* 2022;234(2):e13761.  
729
- 730 30. Oh, E. et al. Munc18-1 regulates first-phase insulin release by promoting granule  
731 docking to multiple syntaxin isoforms. *J Biol Chem.* 2012;287(31):25821-33.  
732
- 733 31. Nagamatsu, S. et al. alpha-soluble N-ethylmaleimide-sensitive factor attachment  
734 protein is expressed in pancreatic beta cells and functions in insulin but not gamma-  
735 aminobutyric acid secretion. *J Biol Chem.* 1999;274(12):8053-60.  
736
- 737 32. Dolai, S. et al. Synaptotagmin-7 Functions to Replenish Insulin Granules for  
738 Exocytosis in Human Islet  $\beta$ -Cells. *Diabetes.* 2016;65(7):1962-76.

739

740 33. Ohara-Imaizumi, M. et al. Imaging analysis reveals mechanistic differences between  
741 first- and second-phase insulin exocytosis. *J Cell Biol.* 2007;177(4):695-705.

742

743

744 34. Zhang, C. et al. MafA is a key regulator of glucose-stimulated insulin secretion. *Mol*  
745 *Cell Biol.* 2005;25(12):4969-76.

746

747 35. Puigserver, P., Spiegelman, B.M. Peroxisome proliferator-activated receptor-gamma  
748 coactivator 1 alpha (PGC-1 alpha): transcriptional coactivator and metabolic regulator.  
749 *Endocr Rev.* 2003;24(1):78-90.

750

751 36. LaGory, E.L. et al. Suppression of PGC-1 $\alpha$  Is Critical for Reprogramming Oxidative  
752 Metabolism in Renal Cell Carcinoma. *Cell Rep.* 2015;12(1):116-127.

753

754 37. Chung, S.Y. et al. Bhlhe40 Represses PGC-1 $\alpha$  Activity on Metabolic Gene Promoters  
755 in Myogenic Cells. *Mol Cell Biol.* 2015;35(14):2518-29.

756

- 757 38. Raum, J.C. et al. FoxA2, Nkx2.2, and PDX-1 regulate islet beta-cell-specific mafA  
758 expression through conserved sequences located between base pairs -8118 and -7750  
759 upstream from the transcription start site. *Mol Cell Biol.* 2006;26(15):5735-43.  
760
- 761 39. Yamamoto, K. et al. A novel function of Onecut1 protein as a negative regulator of  
762 MafA gene expression. *J Biol Chem.* 2013;288(30):21648-58.  
763
- 764 40. Mathelier, A. et al. JASPAR 2016: a major expansion and update of the open-access  
765 database of transcription factor binding profiles. *Nucleic Acids Res.*  
766 2016;44(D1):D110-5.  
767
- 768 41. Sun, H., Taneja, R. Stra13 expression is associated with growth arrest and represses  
769 transcription through histone deacetylase (HDAC)-dependent and HDAC-  
770 independent mechanisms. *Proc Natl Acad Sci U S A.* 2000;97(8):4058-63.  
771
- 772 42. Ivanova, A.V. et al. STRA13 interacts with STAT3 and modulates transcription of  
773 STAT3-dependent targets. *J Mol Biol.* 2004;340(4):641-53.  
774

- 775 43. Raum, J.C. et al. Islet beta-cell-specific MafA transcription requires the 5'-flanking  
776 conserved region 3 control domain. *Mol Cell Biol.* 2010;30(17):4234-44.  
777
- 778 44. Skarnes, W.C. et al. A conditional knockout resource for the genome-wide study of  
779 mouse gene function. *Nature.* 2011;474(7351):337-42.  
780
- 781 45. Hsiao, S.P. et al. P/CAF rescues the Bhlhe40-mediated repression of MyoD  
782 transactivation. *Biochem J.* 2009;422(2):343-52.  
783
- 784 46. Gaston, K., Jayaraman, P.S. Transcriptional repression in eukaryotes: repressors and  
785 repression mechanisms. *Cell Mol Life Sci.* 2003;60(4):721-41.  
786
- 787 47. Jarjour, N.N. et al. Bhlhe40 mediates tissue-specific control of macrophage  
788 proliferation in homeostasis and type 2 immunity. *Nat Immunol.* 2019;20(6):687-700.  
789
- 790 48. Lin, J. et al. Metabolic control through the PGC-1 family of transcription coactivators.  
791 *Cell Metab.* 2005;1(6):361-70.  
792

- 793 49. Ling, C. et al. Epigenetic regulation of PPARGC1A in human type 2 diabetic islets  
794 and effect on insulin secretion. *Diabetologia*. 2008;51(4):615-22.  
795
- 796 50. Li, D. et al. The repression of IRS2 gene by ATF3, a stress-inducible gene, contributes  
797 to pancreatic beta-cell apoptosis. *Diabetes*. 2008;57(3):635-44.  
798
- 799 51. Ku, H.C., Cheng, C.F. Master Regulator Activating Transcription Factor 3 (ATF3) in  
800 Metabolic Homeostasis and Cancer. *Front Endocrinol (Lausanne)*. 2020;11:556.  
801
- 802 52. Nishiyama, Y. et al. HIF-1 $\alpha$  induction suppresses excessive lipid accumulation in  
803 alcoholic fatty liver in mice. *J Hepatol*. 2012;56(2):441-7.  
804
- 805 53. Shen, L. et al. Hepatic differentiated embryo-chondrocyte-expressed gene 1 (Dec1)  
806 inhibits sterol regulatory element-binding protein-1c (Srebp-1c) expression and  
807 alleviates fatty liver phenotype. *J Biol Chem*. 2014;289(34):23332-42.  
808
- 809 54. Kim, D. et al. Graph-based genome alignment and genotyping with HISAT2 and  
810 HISAT-genotype. *Nat Biotechnol*. 2019;37(8):907-915.

811

812 55. Li, H. et al. The Sequence Alignment/Map format and SAMtools. *Bioinformatics*.

813 2009;25(16):2078-9.

814

815 56. Pertea, M. et al. StringTie enables improved reconstruction of a transcriptome from

816 RNA-seq reads. *Nat Biotechnol*. 2015;33(3):290-5.

817

818 57. Love, M. I. et al. Moderated estimation of fold change and dispersion for RNA-seq

819 data with DESeq2. *Genome Biology*. 2014;15(12):550.

820

821 58. Huang, W. et al. Bioinformatics enrichment tools: paths toward the comprehensive

822 functional analysis of large gene lists. *Nucleic Acids Res*. 2009;37(1):1-13.

823

824 59. Huang W. et al. Systematic and integrative analysis of large gene lists using DAVID

825 bioinformatics resources. *Nat Protoc*. 2009;4(1):44-57.

826

827 60. Subramanian, A. et al. Gene set enrichment analysis: a knowledge-based approach for

828 interpreting genome-wide expression profiles. *Proc Natl Acad Sci U S A*.

829 2005;102(43):15545-50.

830

## 831 FIGURES

832 **Figure 1. Global gene expression in hypoxic  $\beta$ -cells and islets.** (A) Heatmap of  $\beta$ -cell  
833 genes in mouse islets (20% vs 5% O<sub>2</sub> for 24 hours; n = 3) and human islets (20% [n = 2]  
834 or 2% [n = 3] O<sub>2</sub> for 24 hours). (B) Gene set enrichment analysis of mouse islets (20% vs  
835 5% O<sub>2</sub> for 24 hours; n = 3) and human islets (20% [n = 2] or 2% [n = 3] O<sub>2</sub> for 24 hours).  
836 (C) RNA-seq data of hypoxia-induced genes in mouse islets (20% vs 5% O<sub>2</sub> for 24 hours;  
837 n = 3), human islets (20% [n = 2] vs 2% [n = 3] O<sub>2</sub> for 24 hours), and MIN6 cells (20%  
838 vs 5% O<sub>2</sub> for 6 hours; n = 3). The Venn diagram shows the coordinated elevation of 25  
839 genes, two of which (*Atf3* and *Bhlhe40*) are associated with transcriptional repression.  
840 (D-F) Volcano plots showing RNA-seq data in mouse islets (20% vs 5% O<sub>2</sub> for 24 hours;  
841 n = 3; D), human islets (20% [n = 2] vs 2% [n = 3] O<sub>2</sub> for 24 hours; E), and MIN6 cells  
842 (20% vs 5% O<sub>2</sub> for 6 hours; n = 3; F). *Atf3*, *Bhlhe40*, and other reported hypoxia-inducible  
843 transcriptional repressor genes (17) are shown (red, significantly upregulated genes).

844

845 **Figure 2. BHLHE40 expression and its regulation in hypoxic  $\beta$ -cells and islets.** (A-  
846 C) Western blots of BHLHE40 expression across tissues (A), BHLHE40 expression in

847 MIN6 cells cultured under 20% or 5% O<sub>2</sub> for the indicated time (B), and BHLHE40  
848 expression in mouse islets cultured under 20% or 5% O<sub>2</sub> for 24 hours (C). (D-F) The  
849 effect of oxidative stress, endoplasmic reticulum stress, and energy stress on BHLHE40  
850 expression. qRT-PCR analysis of *Bhlhe40* in MIN6 cells incubated with 10μM H<sub>2</sub>O<sub>2</sub> (n =  
851 3; D), 2μM thapsigargin (Thap) or 5 μg/ml tunicamycin (Tun) (n = 3; E), or 2mM  
852 metformin (Met) for 24 hours (n = 3; F). (G) The effect of short-hairpin RNA-mediated  
853 *Hif1β* knockdown (KD) on BHLHE40 expression in MIN6 cells cultured under 20% or  
854 5% O<sub>2</sub> for 24 hours (n = 3). (H-K) BHLHE40 expression in islets from diabetic mice.  
855 BHLHE40 expression was analyzed in *ob/ob* mouse islets by qRT-PCR (n = 4; H) and  
856 Western blotting (I) and in *db/db* mouse islets by Western blotting (J). Subcellular  
857 localization of BHLHE40 in *ob/ob* mice islets by immunohistochemical analysis (K).  
858 Data are mean ± SEM; \*p < 0.05 and \*\*\*p < 0.001 by unpaired two-tailed Student's *t* test.  
859 Glyceraldehyde-3-phosphate dehydrogenase (GAPDH) or β-actin was used as a loading  
860 control. Scale bar, 10 μm. HPT, hypothalamus; Ctrl, control; n.s., not significant.

861

862 **Figure 3. BHLHE40 controls insulin secretion in β-cells.** (A) Glucose-stimulated  
863 insulin secretion in MIN6 cells expressing short hairpin RNA against a non-targeting Ctrl  
864 or *Bhlhe40* knockdown (*B40* KD) were cultured under 20% or 5% O<sub>2</sub> for 24 hours (n =



865 8). **(B)** Insulin contents in MIN6 cells cultured under 20% or 5% O<sub>2</sub> for 24 hours (n = 3).  
866 **(C)** Glucose-stimulated insulin secretion in MIN6 cells infected with retroviruses  
867 generated with pMx-Ctrl (Ctrl) or pMx-*Bhlhe40* (*B40* OE; n = 4). **(D)** KCl-stimulated  
868 insulin secretion in Ctrl and *B40* KD MIN6 cells cultured under 20% or 5% O<sub>2</sub> for 24  
869 hours (n = 4). **(E)** KCl-stimulated insulin secretion in Ctrl and *B40* OE MIN6 cells (n =  
870 3). **(F-G)** Calcium influx stimulated by 30mM KCl in Ctrl and *B40* OE MIN6 cells (n =  
871 70 cells from n = 3 biological replicates) **(F)** and the AUC of **F (G)**. **(H)** hGH secretion  
872 after stimulation by 2.2mM glucose or 2.2mM glucose plus 30mM KCl in Ctrl and *B40*  
873 KD MIN6 cells cultured under 20% or 5% O<sub>2</sub> for 24 hours (n = 3). **(I-K)** Glucose uptake  
874 (n = 3; **I**), cellular ATP content (n = 4; **J**), and mitochondrial mass (n = 4 ;**K**) in Ctrl and  
875 *B40* KD MIN6 cells cultured under 20% or 5% O<sub>2</sub> for 24 hours. Data are mean ± SEM;  
876 \*p < 0.05 and \*\*\*p < 0.001 by unpaired two-tailed Student's *t* test. Ctrl, control; n.s., not  
877 significant.

878

879 **Figure 4. BHLHE40 suppresses *Mafa* expression in β-cells.** **(A)** MA plot of RNA-seq  
880 data in Ctrl and *B40* OE MIN6 cells. Differentially expressed genes (DEGs; adjusted p  
881 value < 0.01) are shown in blue, and others in gray. DEGs functioning as β-cell  
882 transcription factors are shown in red (n = 3). **(B)** Gene ontology analysis of RNA-seq

883 data. Downregulated DEGs were used as input. (C and D) Expression of DEGs shown in  
884 A was confirmed by qRT-PCR in Ctrl and *B40* OE MIN6 cells (n = 3; C) or Ctrl and *B40*  
885 KD MIN6 cells cultured under 20% or 5% O<sub>2</sub> for 24 hours (n = 3; D). (E-F) Western blot  
886 of BHLHE40 and MAFA expression in Ctrl and *B40* OE MIN6 cells (E) or Ctrl and *B40*  
887 KD MIN6 cells cultured under 20% or 5% O<sub>2</sub> for 24 hours (F). (G) qRT-PCR of MAFA  
888 target genes in Ctrl and *B40* KD MIN6 cells cultured under 20% or 5% O<sub>2</sub> for 24 hours  
889 (n = 3). (H) Glucose-stimulated insulin secretion in MIN6 cells infected with AAV-green  
890 fluorescent protein (GFP) (Ctrl) or AAV-*Mafa* and cultured under 20% or 5% O<sub>2</sub> for 24  
891 hours (n = 4). (I) KCl-stimulated insulin secretion in MIN6 cells infected with AAV-GFP  
892 (Ctrl) and AAV-*Mafa* and cultured under 20% or 5% O<sub>2</sub> for 24 hours (n = 4). Data are  
893 mean ± SEM; \*p < 0.05, \*\*p < 0.01 and \*\*\*p < 0.001 by unpaired two-tailed Student's *t*  
894 test. β-actin was used as a loading control. Ctrl, control.

895

896 **Figure 5. BHLHE40 controls *Mafa* expression via two E-box sites in the enhancer**  
897 **region.** (A) Reporter gene analysis with luciferase plasmid infused with mouse MAFA  
898 promoter/enhancer (-10427/+22 bp from transcription start site) in Ctrl and *B40* KD  
899 MIN6 cells cultured under 20% or 5% O<sub>2</sub> for 24 hours (n = 4). (B) BHLHE40-binding  
900 motif (upper left) and JASPAR results (lower left) are presented. JASPAR predicted four

901 E-box sites for BHLHE40 binding on MAFA promoter/enhancer (relative score > 0.9, E-  
902 box sites are underlined). (C) Luciferase reporter assay was performed with MIN6 cells  
903 transfected with BHLHE40 expression plasmids, pRL-SV40 plasmid, and pGL3-Mafa  
904 plasmids (wildtype [black] and E-box mutated [red] sites; n = 4). (D) Luciferase reporter  
905 activity in MIN6 cells cultured under 20% or 5% O<sub>2</sub> for 24 hours (n = 3). (E) MIN6 cells  
906 were cultured in 20% or 5% O<sub>2</sub> for 24 hours, and then the proteins were immuno-  
907 precipitated by IgG or anti-BHLHE40 specific antibody, after which qRT-PCR was  
908 performed for the indicated regions (n = 3). (F) Luciferase reporter assay in MIN6 cells  
909 incubated with 0.1 μM TSA or vehicle for 24 hours (n = 4). (G) Proteins sampled from  
910 Ctrl and *B40* OE MIN6 cells with FLAG-Pdx1 expression were immuno-precipitated by  
911 IgG or anti-FLAG antibody, after which qRT-PCR was performed for the indicated  
912 regions (n = 9). Data are mean ± SEM; \*p < 0.05 \*\*p < 0.01, and \*\*\*p < 0.001 by  
913 unpaired two-tailed Student's *t* test. Ctrl, control; n.s., not significant.

914

915 **Figure 6. Deficiency of BHLHE40 improves hyperglycaemia in *ob/ob* mice.** (A)

916 Glucose tolerance test of *Pdx1*-Cre (*Cre*), *Bhlhe40*<sup>fl/fl</sup> (*B40*<sup>fl/fl</sup>), and *Pdx1*-Cre:*Bhlhe40*<sup>fl/fl</sup>  
917 (*Cre*:*B40*<sup>fl/fl</sup>) mice (n = 7, n = 12, and n = 9 respectively; 8-12 weeks old). (B) Body weight  
918 of *Bhlhe40*<sup>fl/fl</sup> (Ctrl):*ob/ob* and *Pdx1*-Cre:*Bhlhe40*<sup>fl/fl</sup> (βB40KO):*ob/ob* mice (n = 9 and n

919 = 6, respectively). (C and D) Glucose tolerance test of Ctrl:*ob/ob* and  $\beta$ B40KO:*ob/ob*  
920 mice (n = 9 and n = 8, respectively; 6 weeks old) (C) and AUC (D). (E) Glucose-  
921 stimulated insulin secretion in Ctrl:*ob/ob* and  $\beta$ B40KO:*ob/ob* mice (n = 9 and n = 6,  
922 respectively; 8 weeks old). (F) Glucose-stimulated insulin secretion in isolated islets from  
923 Ctrl and  $\beta$ B40KO mice after culture under 5% O<sub>2</sub> for 24 hours (n = 8). (G) KCl-stimulated  
924 insulin secretion in isolated islets from Ctrl and  $\beta$ B40KO mice after incubation with 5%  
925 O<sub>2</sub> for 24 hours (n = 8). (H) ATP content in isolated islets of Ctrl and  $\beta$ B40KO mice after  
926 incubation with 20% or 5% O<sub>2</sub> for 24 hours (n = 4). (I and J) Representative images of  
927 pancreatic islets stained for insulin and glucagon in Ctrl:*ob/ob* and  $\beta$ B40KO:*ob/ob* mice  
928 (12 weeks old) (I). The ratios of total islet area to whole pancreas area (%) are shown (n  
929 = 3; J). (K and L) Representative images of pancreatic islets stained for insulin, MAFA,  
930 and BHLHE40 in Ctrl:*ob/ob* and  $\beta$ B40KO:*ob/ob* mice (12 weeks old) (K). Fluorescence  
931 intensities of nuclear and cytosolic MAFA in K were quantified (n = 30; L). (M) qRT-  
932 PCR of *Mafa* and its target genes in Ctrl:*ob/ob* and  $\beta$ B40KO:*ob/ob* mice (n = 4). Data are  
933 mean  $\pm$  SEM; \*p < 0.05 \*\*p < 0.01, and \*\*\*p < 0.001 by unpaired two-tailed Student's *t*  
934 test. Scale bar, 10  $\mu$ m. Ctrl, control; n.s., not significant.

935

936 **Figure 7. A proposed model for how hypoxia causes  $\beta$ -cells dysfunction.**

**A**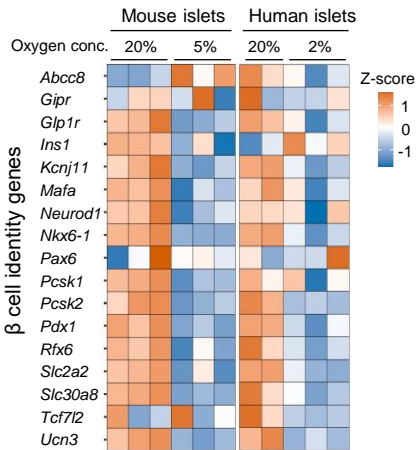**B**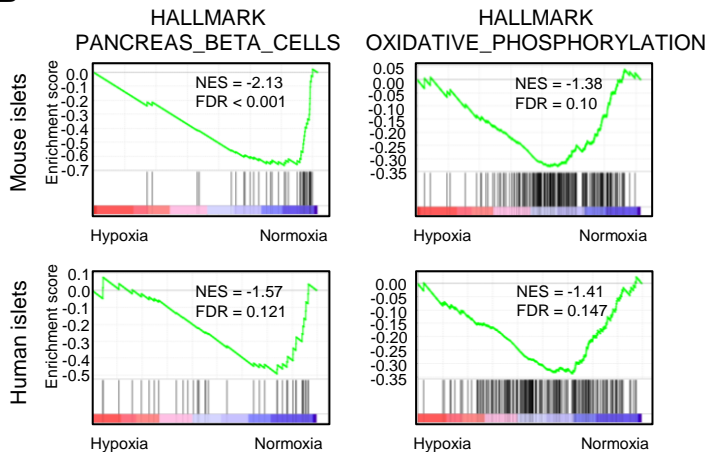**C**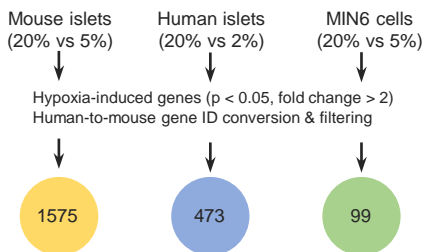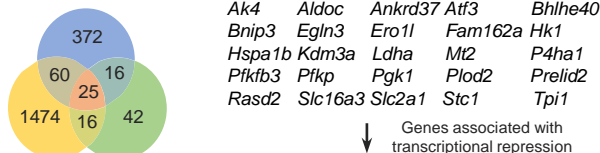

GO:0000122 negative regulation of transcription by RNA polymerase II  
 GO:0001227 DNA-binding transcription repressor activity, RNA polymerase II-specific  
 GO:0003714 transcription corepressor activity  
 GO:0043433 negative regulation of DNA-binding transcription factor activity  
 GO:0045892 negative regulation of transcription, DNA-templated

**D**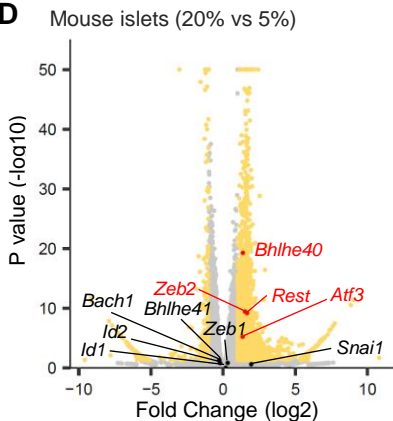**E**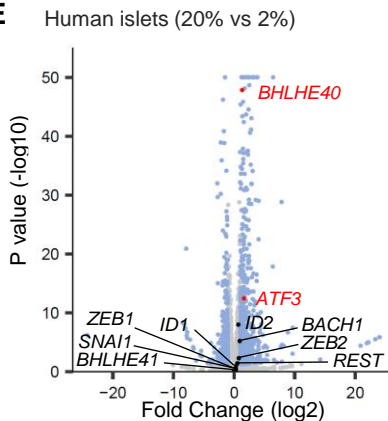**F**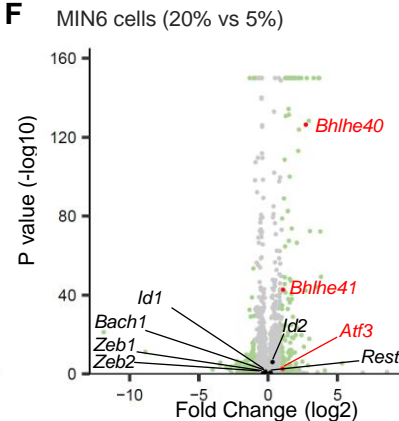

**Figure 1. Global gene expression in hypoxic  $\beta$ -cells and islets.** (A) Heatmap of  $\beta$ -cell genes in mouse islets (20% vs 5% O<sub>2</sub> for 24 hours; n = 3) and human islets (20% [n = 2] or 2% [n = 3] O<sub>2</sub> for 24 hours). (B) Gene set enrichment analysis of mouse islets (20% vs 5% O<sub>2</sub> for 24 hours; n = 3) and human islets (20% [n = 2] or 2% [n = 3] O<sub>2</sub> for 24 hours). (C) RNA-seq data of hypoxia-induced genes in mouse islets (20% vs 5% O<sub>2</sub> for 24 hours; n = 3), human islets (20% [n = 2] vs 2% [n = 3] O<sub>2</sub> for 24 hours), and MIN6 cells (20% vs 5% O<sub>2</sub> for 6 hours; n = 3). The Venn diagram shows the coordinated elevation of 25 genes, two of which (*Atf3* and *Bhlhe40*) are associated with transcriptional repression. (D-F) Volcano plots showing RNA-seq data in mouse islets (20% vs 5% O<sub>2</sub> for 24 hours; n = 3; D), human islets (20% [n = 2] vs 2% [n = 3] O<sub>2</sub> for 24 hours; E), and MIN6 cells (20% vs 5% O<sub>2</sub> for 6 hours; n = 3; F). *Atf3*, *Bhlhe40*, and other reported hypoxia-inducible transcriptional repressor genes (17) are shown (red, significantly upregulated genes).

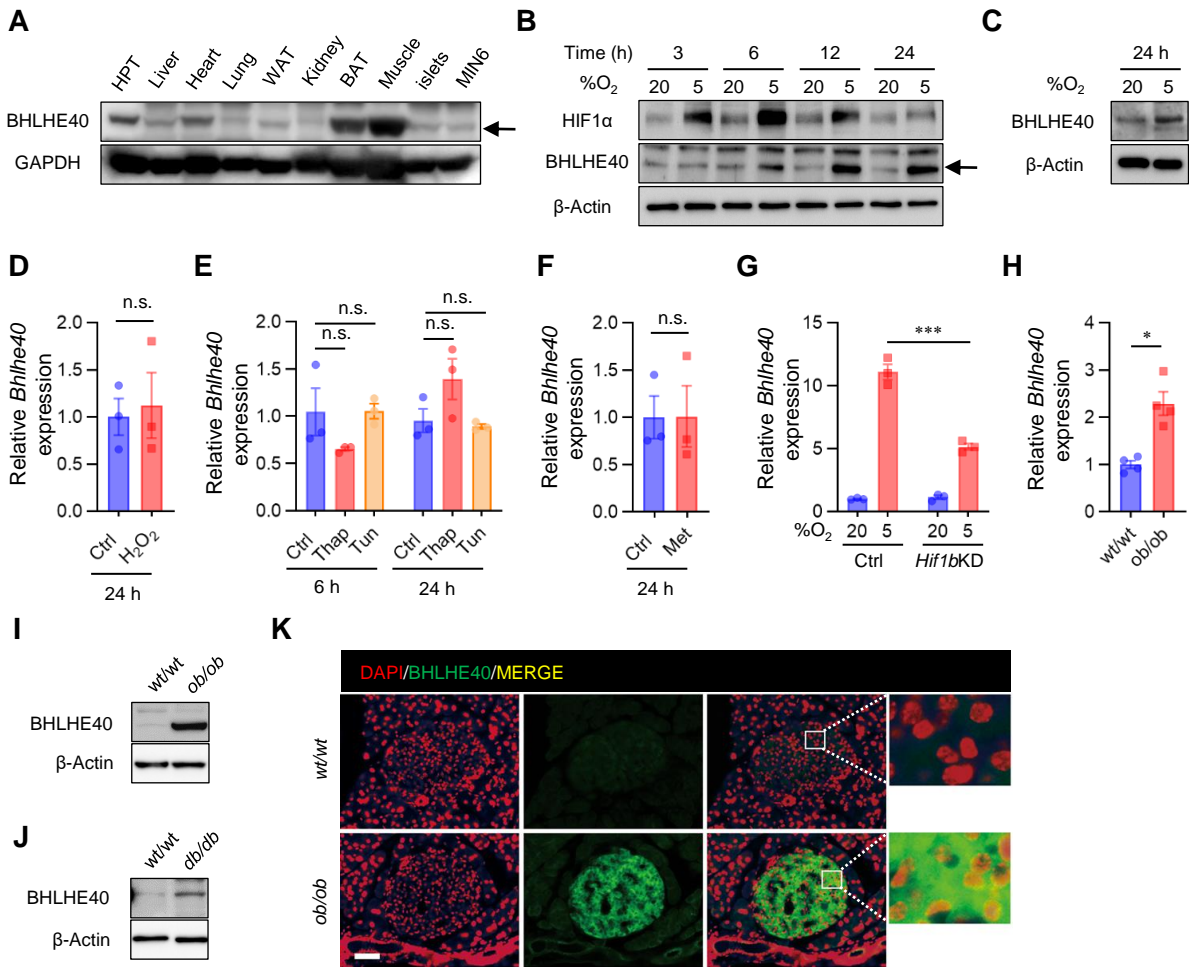

**Figure 2. BHLHE40 expression and its regulation in hypoxic  $\beta$ -cells and islets.** (A-C) Western blots of BHLHE40 expression across tissues (A), BHLHE40 expression in MIN6 cells cultured under 20% or 5% O<sub>2</sub> for the indicated time (B), and BHLHE40 expression in mouse islets cultured under 20% or 5% O<sub>2</sub> for 24 hours (C). (D-F) The effect of oxidative stress, endoplasmic reticulum stress, and energy stress on BHLHE40 expression. qRT-PCR analysis of *Bhlhe40* in MIN6 cells incubated with 10 $\mu$ M H<sub>2</sub>O<sub>2</sub> (n = 3; D), 2 $\mu$ M thapsigargin (Thap) or 5  $\mu$ g/ml tunicamycin (Tun) (n = 3; E), or 2mM metformin (Met) for 24 hours (n = 3; F). (G) The effect of short-hairpin RNA-mediated *Hif1 $\beta$*  knockdown (KD) on BHLHE40 expression in MIN6 cells cultured under 20% or 5% O<sub>2</sub> for 24 hours (n = 3). (H-K) BHLHE40 expression in islets from diabetic mice. BHLHE40 expression was analyzed in *ob/ob* mouse islets by qRT-PCR (n = 4; H) and Western blotting (I) and in *db/db* mouse islets by Western blotting (J). Subcellular localization of BHLHE40 in *ob/ob* mice islets by immunohistochemical analysis (K). Data are mean  $\pm$  SEM; \*p < 0.05 and \*\*\*p < 0.001 by unpaired two-tailed Student's *t* test. Glyceraldehyde-3-phosphate dehydrogenase (GAPDH) or  $\beta$ -actin was used as a loading control. Scale bar, 10  $\mu$ m. HPT, hypothalamus; Ctrl, control; n.s., not significant.



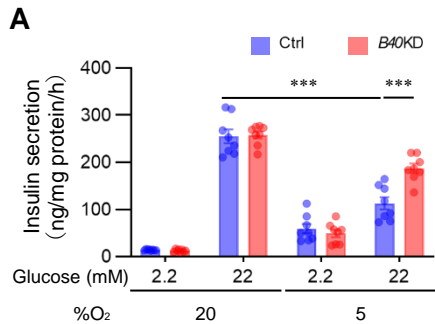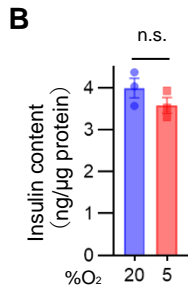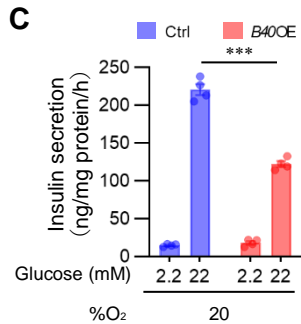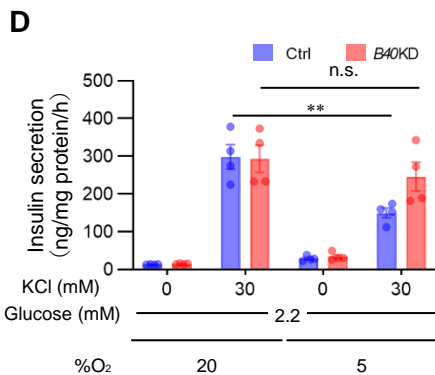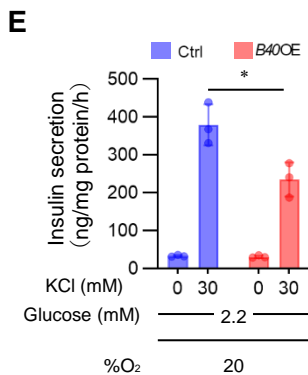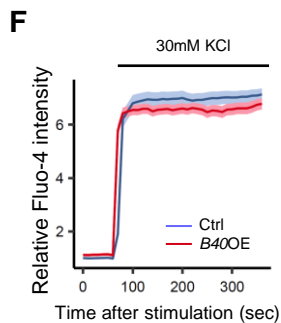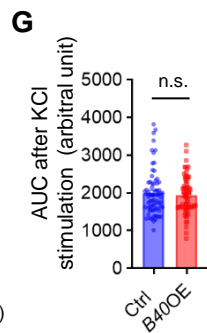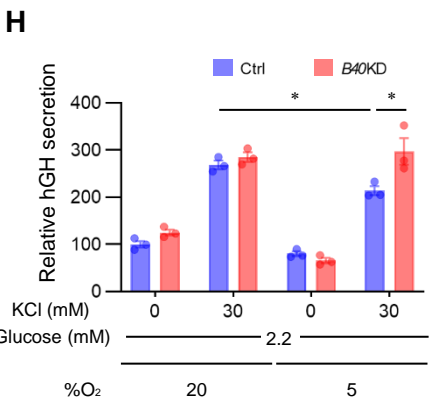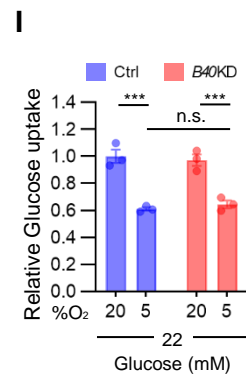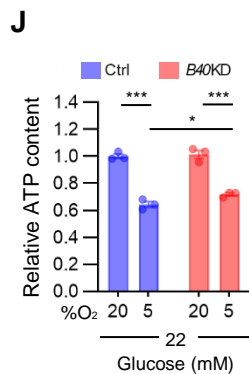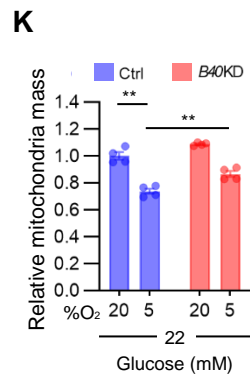

**Figure 3. BHLHE40 controls insulin secretion in  $\beta$ -cells.** (A) Glucose-stimulated insulin secretion in MIN6 cells expressing short hairpin RNA against a non-targeting Ctrl or *Bhlhe40* knockdown (*B40* KD) were cultured under 20% or 5% O<sub>2</sub> for 24 hours (n = 8). (B) Insulin contents in MIN6 cells cultured under 20% or 5% O<sub>2</sub> for 24 hours (n = 3). (C) Glucose-stimulated insulin secretion in MIN6 cells infected with retroviruses generated with pMx-Ctrl (Ctrl) or pMx-*Bhlhe40* (*B40* OE; n = 4). (D) KCl-stimulated insulin secretion in Ctrl and *B40* KD MIN6 cells cultured under 20% or 5% O<sub>2</sub> for 24 hours (n = 4). (E) KCl-stimulated insulin secretion in Ctrl and *B40* OE MIN6 cells (n = 3). (F-G) Calcium influx stimulated by 30mM KCl in Ctrl and *B40* OE MIN6 cells (n = 70 cells from n = 3 biological replicates) (F) and the AUC of F (G). (H) hGH secretion after stimulation by 2.2mM glucose or 2.2mM glucose plus 30mM KCl in Ctrl and *B40* KD MIN6 cells cultured under 20% or 5% O<sub>2</sub> for 24 hours (n = 3). (I-K) Glucose uptake (n = 3; I), cellular ATP content (n = 4; J), and mitochondrial mass (n = 4 ;K) in Ctrl and *B40* KD MIN6 cells cultured under 20% or 5% O<sub>2</sub> for 24 hours. Data are mean  $\pm$  SEM; \*p < 0.05 and \*\*\*p < 0.001 by unpaired two-tailed Student's *t* test. Ctrl, control; n.s., not significant.

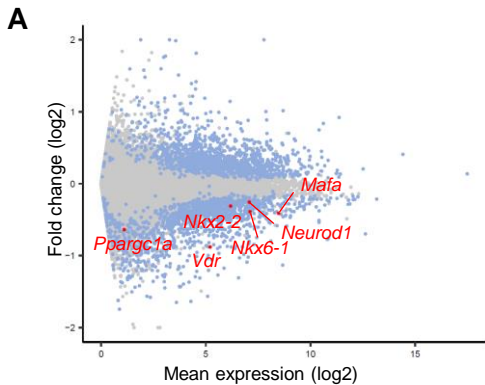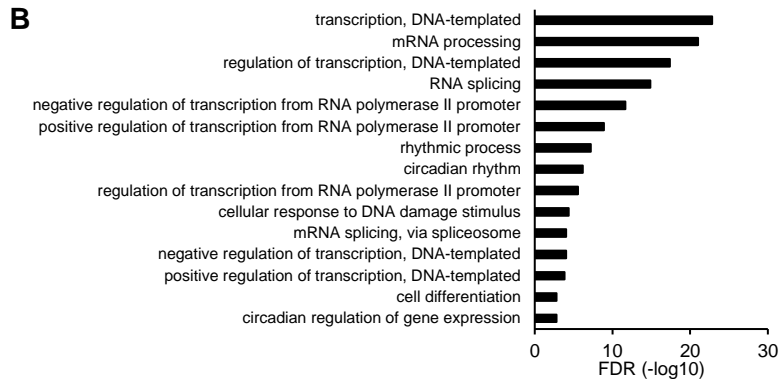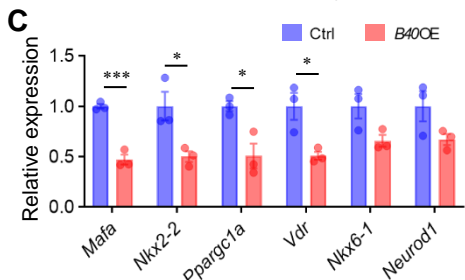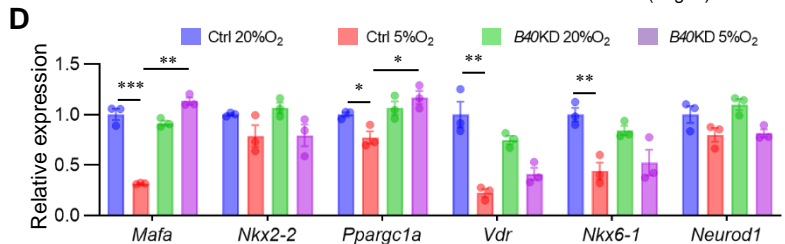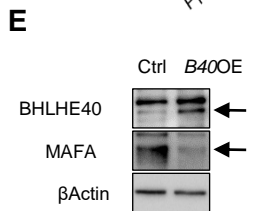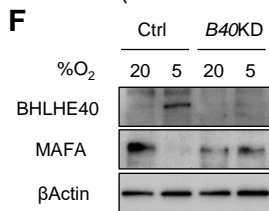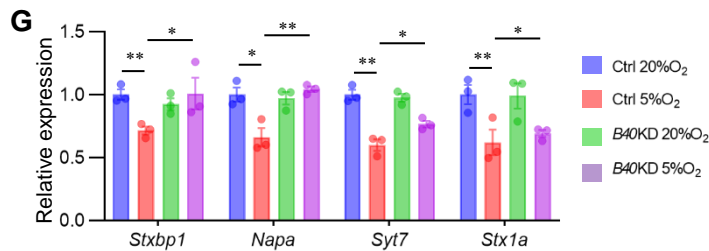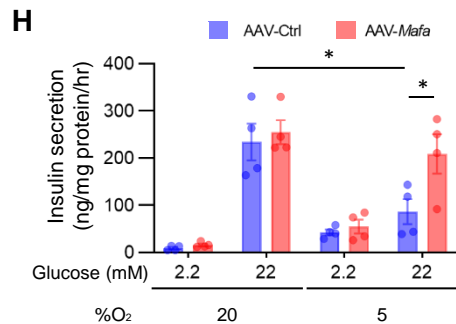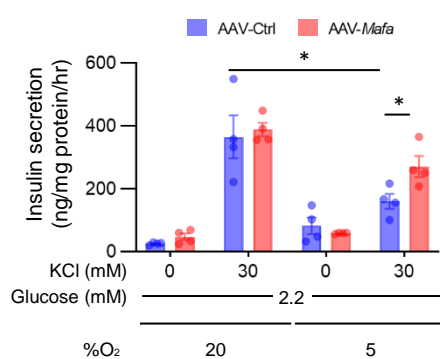

**Figure 4. BHLHE40 suppresses *Mafa* expression in  $\beta$ -cells.** (A) MA plot of RNA-seq data in Ctrl and *B40* OE MIN6 cells. Differentially expressed genes (DEGs; adjusted p value < 0.01) are shown in blue, and others in gray. DEGs functioning as  $\beta$ -cell transcription factors are shown in red (n = 3). (B) Gene ontology analysis of RNA-seq data. Downregulated DEGs were used as input. (C and D) Expression of DEGs shown in A was confirmed by qRT-PCR in Ctrl and *B40* OE MIN6 cells (n = 3; C) or Ctrl and *B40* KD MIN6 cells cultured under 20% or 5% O<sub>2</sub> for 24 hours (n = 3; D). (E-F) Western blot of BHLHE40 and MAFA expression in Ctrl and *B40* OE MIN6 cells (E) or Ctrl and *B40* KD MIN6 cells cultured under 20% or 5% O<sub>2</sub> for 24 hours (F). (G) qRT-PCR of MAFA target genes in Ctrl and *B40* KD MIN6 cells cultured under 20% or 5% O<sub>2</sub> for 24 hours (n = 3). (H) Glucose-stimulated insulin secretion in MIN6 cells infected with AAV-green fluorescent protein (GFP) (Ctrl) or AAV-*Mafa* and cultured under 20% or 5% O<sub>2</sub> for 24 hours (n = 4). (I) KCl-stimulated insulin secretion in MIN6 cells infected with AAV-GFP (Ctrl) and AAV-*Mafa* and cultured under 20% or 5% O<sub>2</sub> for 24 hours (n = 4). Data are mean  $\pm$  SEM; \*p < 0.05, \*p < 0.01 and \*\*\*p < 0.001 by unpaired two-tailed Student's *t* test.  $\beta$ -actin was used as a loading control. Ctrl, control.

**A**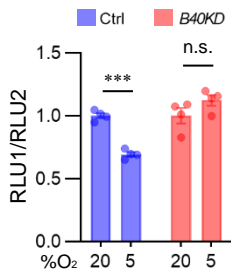**B**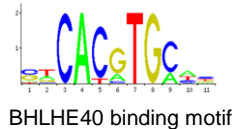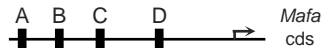

A (-9909/-9899) | GACACCTGCTG  
 B (-8706/-8695) | TGCACATGATT  
 C (-6987/-6976) | GGCATGTGCTT  
 D (-4949/-4938) | GGCACATGCTG

**C**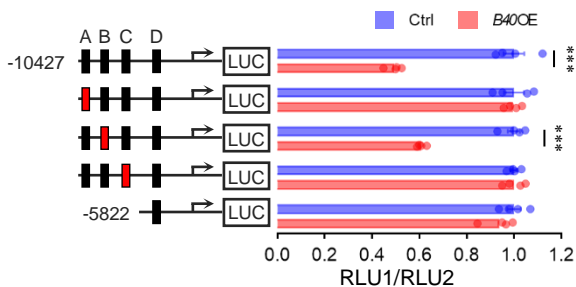**D**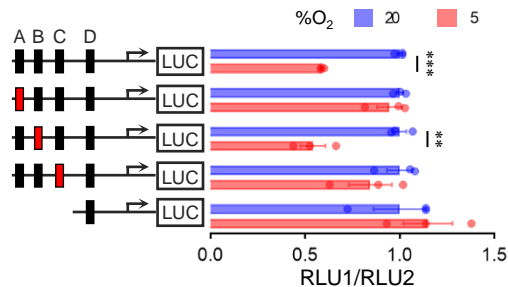**E**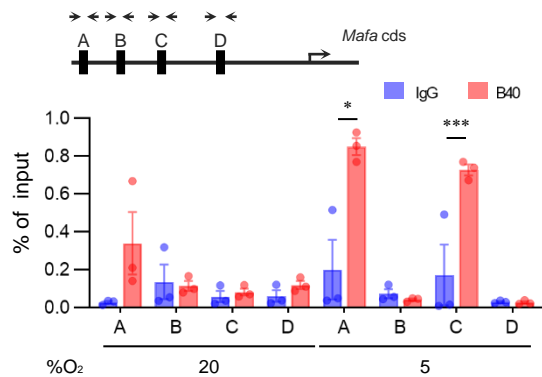**F**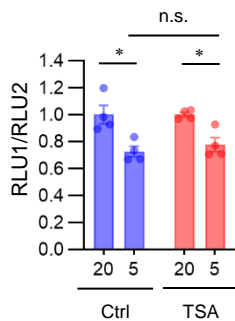**G**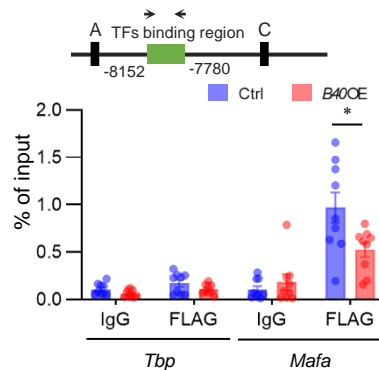

**Figure 5. BHLHE40 controls *Mafa* expression via two E-box sites in the enhancer region.** (A) Reporter gene analysis with luciferase plasmid infused with mouse MAFA promoter/enhancer (-10427/+22 bp from transcription start site) in Ctrl and *B40* KD MIN6 cells cultured under 20% or 5% O<sub>2</sub> for 24 hours (n = 4). (B) BHLHE40-binding motif (upper left) and JASPAR results (lower left) are presented. JASPAR predicted four E-box sites for BHLHE40 binding on MAFA promoter/enhancer (relative score > 0.9, E-box sites are underlined). (C) Luciferase reporter assay was performed with MIN6 cells transfected with BHLHE40 expression plasmids, pRL-SV40 plasmid, and pGL3-*Mafa* plasmids (wildtype [black] and E-box mutated [red] sites; n = 4). (D) Luciferase reporter activity in MIN6 cells cultured under 20% or 5% O<sub>2</sub> for 24 hours (n = 3). (E) MIN6 cells were cultured in 20% or 5% O<sub>2</sub> for 24 hours, and then the proteins were immuno-precipitated by IgG or anti-BHLHE40 specific antibody, after which qRT-PCR was performed for the indicated regions (n = 3). (F) Luciferase reporter assay in MIN6 cells incubated with 0.1μM TSA or vehicle for 24 hours (n = 4). (G) Proteins sampled from Ctrl and *B40* OE MIN6 cells with FLAG-Pdx1 expression were immuno-precipitated by IgG or anti-FLAG antibody, after which qRT-PCR was performed for the indicated regions (n = 9). Data are mean ± SEM; \*p < 0.05 \*\*p < 0.01, and \*\*\*p < 0.001 by unpaired two-tailed Student's *t* test. Ctrl, control; n.s., not significant.

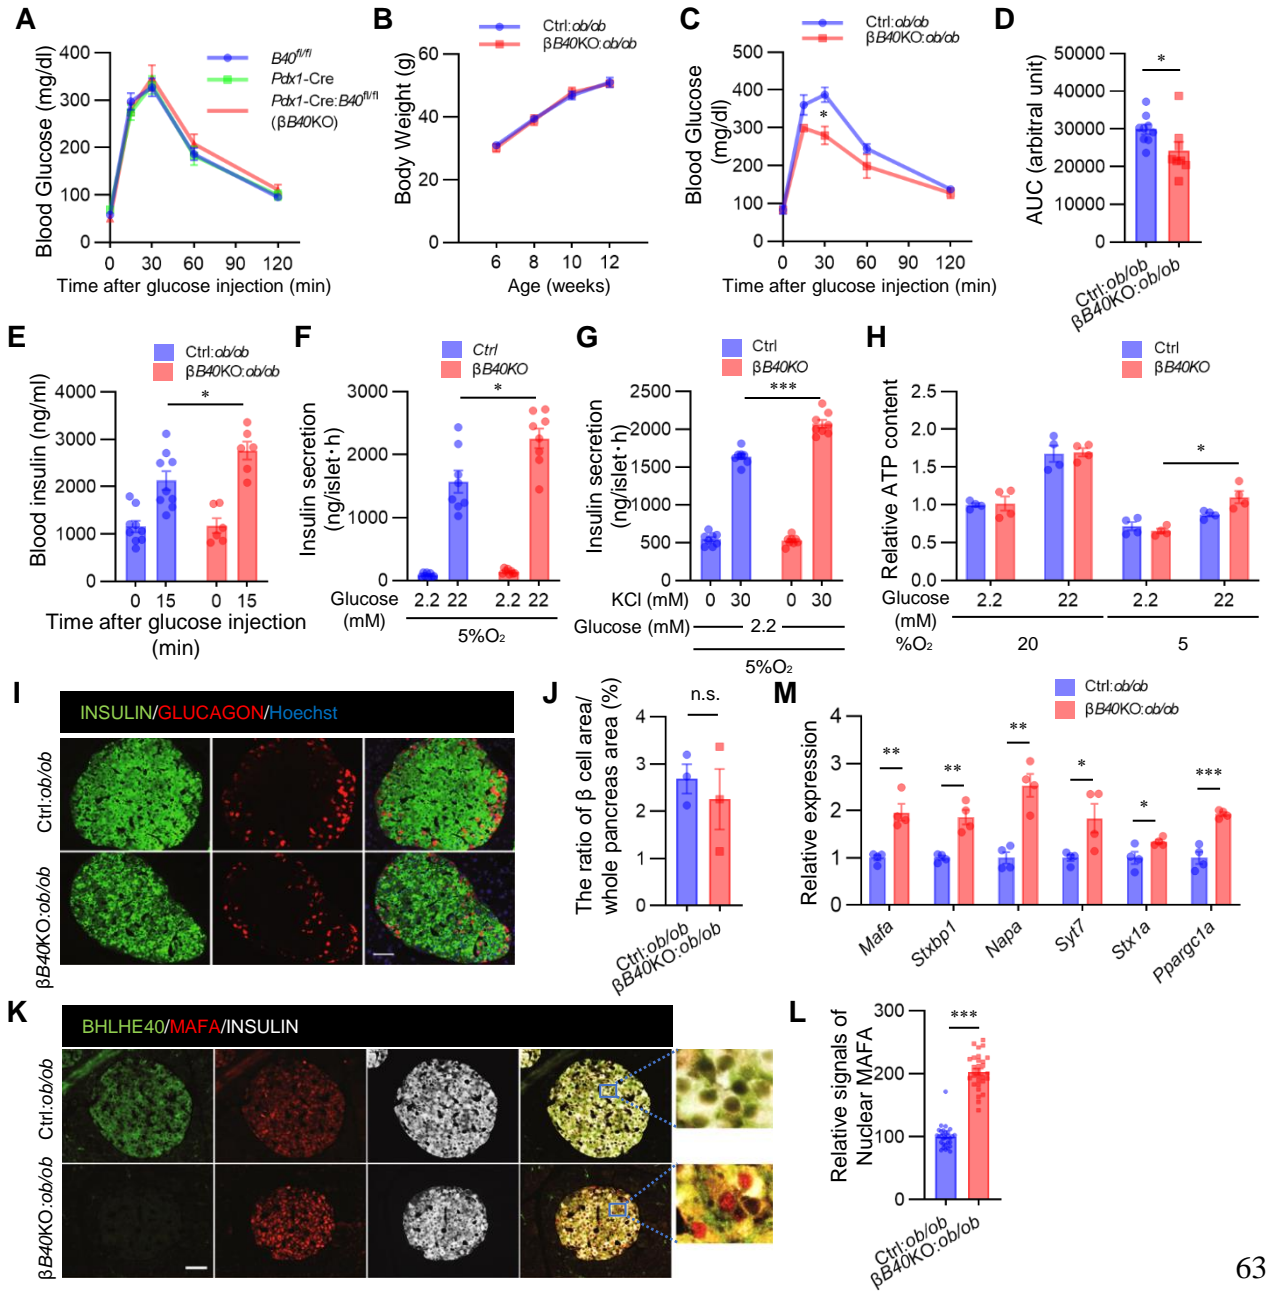

**Figure 6. Deficiency of BHLHE40 improves hyperglycaemia in *ob/ob* mice.** (A) Glucose tolerance test of *Pdx1-Cre (Cre)*, *Bhlhe40<sup>fl/fl</sup> (B40<sup>fl/fl</sup>)*, and *Pdx1-Cre:Bhlhe40<sup>fl/fl</sup> (Cre:B40<sup>fl/fl</sup>)* mice (n = 7, n = 12, and n = 9 respectively; 8-12 weeks old). (B) Body weight of *Bhlhe40<sup>fl/fl</sup> (Ctrl):ob/ob* and *Pdx1-Cre:Bhlhe40<sup>fl/fl</sup> (βB40KO):ob/ob* mice (n = 9 and n = 6, respectively). (C and D) Glucose tolerance test of *Ctrl:ob/ob* and *βB40KO:ob/ob* mice (n = 9 and n = 8, respectively; 6 weeks old) (C) and AUC (D). (E) Glucose-stimulated insulin secretion in *Ctrl:ob/ob* and *βB40KO:ob/ob* mice (n = 9 and n = 6, respectively; 8 weeks old). (F) Glucose-stimulated insulin secretion in isolated islets from *Ctrl* and *βB40KO* mice after culture under 5% O<sub>2</sub> for 24 hours (n = 8). (G) KCl-stimulated insulin secretion in isolated islets from *Ctrl* and *βB40KO* mice after incubation with 5% O<sub>2</sub> for 24 hours (n = 8). (H) ATP content in isolated islets of *Ctrl* and *βB40KO* mice after incubation with 20% or 5% O<sub>2</sub> for 24 hours (n = 4). (I and J) Representative images of pancreatic islets stained for insulin and glucagon in *Ctrl:ob/ob* and *βB40KO:ob/ob* mice (12 weeks old) (I). The ratios of total islet area to whole pancreas area (%) are shown (n = 3; J). (K and L) Representative images of pancreatic islets stained for insulin, MAFA, and BHLHE40 in *Ctrl:ob/ob* and *βB40KO:ob/ob* mice (12 weeks old) (K). Fluorescence intensities of nuclear and cytosolic MAFA in K were quantified (n = 30; L). (M) qRT-PCR of *Mafa* and its target genes in *Ctrl:ob/ob* and *βB40KO:ob/ob* mice (n = 4). Data are mean ± SEM; \*p < 0.05 \*\*p < 0.01, and \*\*\*p < 0.001 by unpaired two-tailed Student's *t* test. Scale bar, 10 μm. Ctrl, control; n.s., not significant.



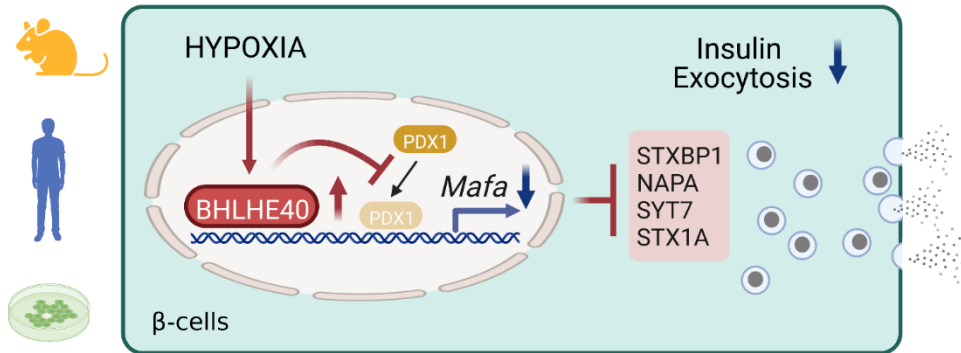

**Figure 7. A proposed model for how hypoxia causes  $\beta$ -cells dysfunction.**
